# Supplementary material for: Thresholds of biodiversity and ecosystem function in a forest ecosystem undergoing dieback
Source: PubMed Central journal article supplement (PMC5533776; doi:10.1038/s41598-017-06082-6), 2017-07-28
Supplement: 41598_2017_6082_MOESM1_ESM.pdf [file 41598_2017_6082_MOESM1_ESM.pdf]

1 **Supplementary Information**

2 for

3 **'Thresholds of biodiversity and ecosystem function in a forest ecosystem undergoing**  
4 **dieback'**

5  
6 P. M. Evans<sup>1</sup>, A. C. Newton<sup>1</sup>, E. Cantarello<sup>1</sup>, P. Martin<sup>1</sup>, N. Sanderson<sup>2</sup>, D. L. Jones<sup>3</sup>, N.  
7 Barsoum<sup>4</sup>, J. E. Cottrell<sup>4</sup>, S. W. A'Hara<sup>4</sup>, L. Fuller<sup>5</sup>

8 <sup>1</sup>Centre for Conservation Ecology and Environmental Sciences, Faculty of Science and  
9 Technology, Bournemouth University, Poole, BH12 5BB, UK.

10 <sup>2</sup>Botanical Survey and Assessment, 3 Green Close, Woodlands, Southampton, Hampshire,  
11 SO40 7HU, UK.

12 <sup>3</sup>School of Environment, Natural Resources and Geography, Bangor University, Gwynedd,  
13 LL57 2UW, UK.

14 <sup>4</sup>Forest Research, Alice Holt Lodge, Farnham, Surrey, GU10 4LH, UK.

15 <sup>5</sup>Biological and Environmental Sciences, University of Stirling, Stirling, FK9 4LA, UK.

16 Tel +44 (0) 1202 961831

17 pevans@bournemouth.ac.uk

18  
19  
20 **Inventory of Supplementary Information:**

21 **Table S1:** Basal area statistics.

22 **Fig. S1:** Graph of stand basal area over the dieback gradient.

23 **Fig. S2:** Non-threshold relationships between stage of dieback and ecosystem processes.

24 **Supplementary Methods, SM1:** Additional methods for experimental design and most data  
25 collection.

26 **Supplementary Methods, SM2:** Methods for collecting and analysing ground-dwelling  
27 arthropods data.

28 **Table S2:** Summary of variables measured and units used.

29 **Table S3:** Generalised linear mixed models used for the study and their results.

30 **Table S4:** Updated version of Table S3 with only linear and quadratic term of BA included as  
31 fixed effects.

32 **Table S5:** Statistics of the soil properties.

33 **Supplementary Methods, SM3:** Graphs to support the space-for-time assumption.

34

35



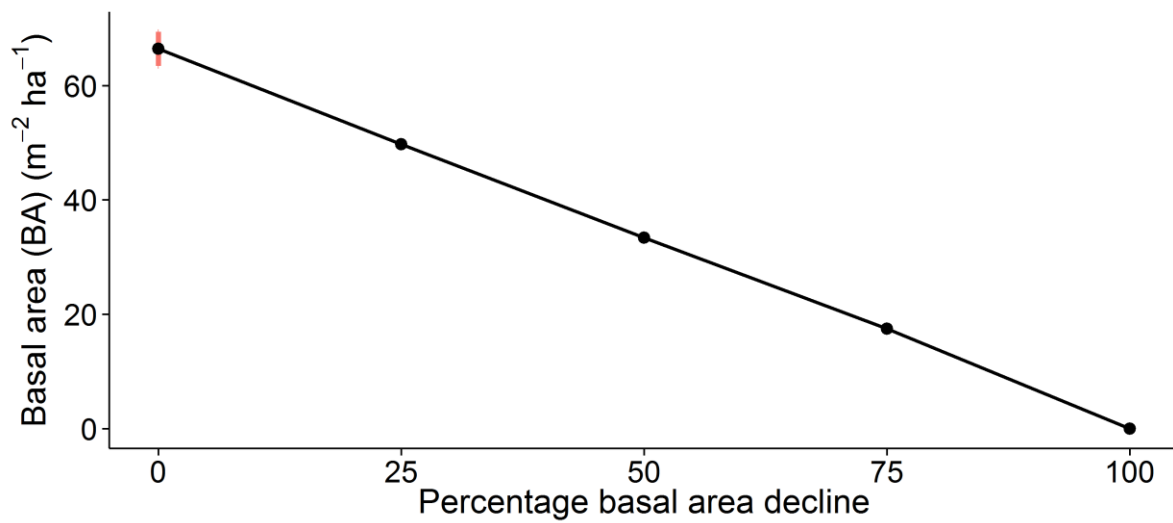

37 Fig. S1: The mean stand basal area (BA) of dieback stages of the gradient plots. Standard error bars are  
 38 shown in red.

39

| Percent basal area decline | N  | BA    |       |      |      |       |       |
|----------------------------|----|-------|-------|------|------|-------|-------|
|                            |    | Mean  | SD    | SE   | CI   | Min   | Max   |
| 0%                         | 12 | 66.42 | 10.29 | 2.97 | 6.54 | 59.85 | 98.39 |
| 25%                        | 12 | 49.71 | 1.36  | 0.39 | 0.86 | 47.73 | 52.12 |
| 50%                        | 12 | 33.37 | 1.79  | 0.52 | 1.14 | 30.58 | 37.12 |
| 75%                        | 12 | 17.45 | 1.47  | 0.42 | 0.93 | 13.65 | 19.44 |
| 100%                       | 12 | 0     | 0     | 0    | 0    | 0     | 0     |

40 Table S1: Basal area (BA) statistics. Mean, standard deviation (SD), standard error (SE), confidence interval  
 41 (CI), minimum (Min) size of BA and maximum (Max) size of BA for each of the stages of dieback.

42

43

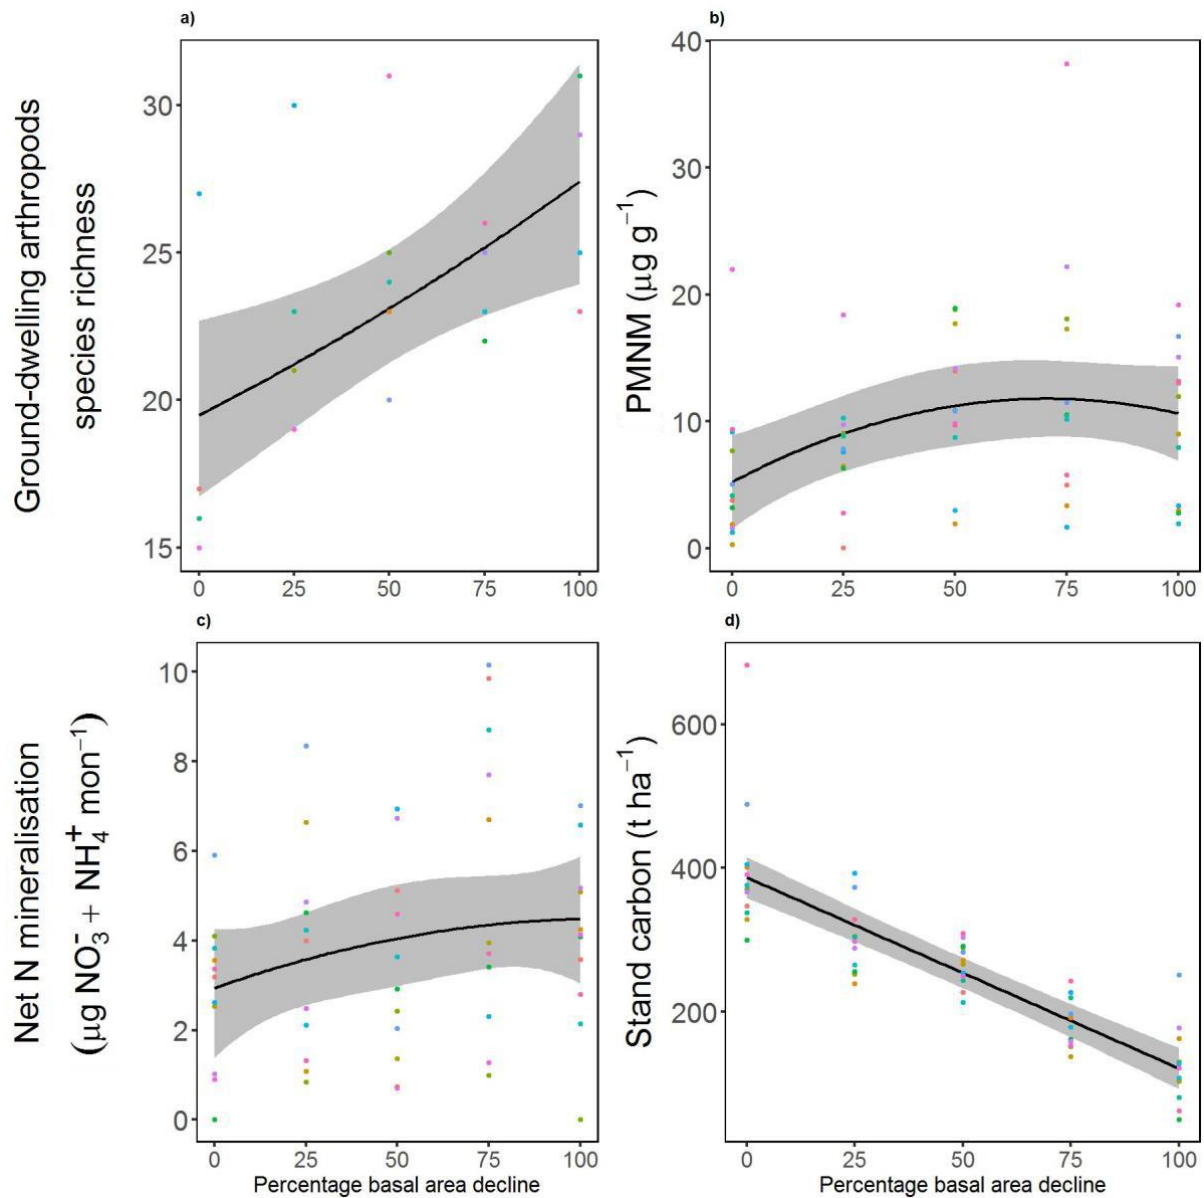

44

45 *Fig. S2: Non-threshold relationships between stage of dieback and ecosystem processes. Relationships*  
 46 *between stage of dieback and a) ground-dwelling arthropods (n = 25); b) potentially mineralisable nitrogen*  
 47 *in the mineral layer (PMNM) (n = 60); c) net mineralisation per month (n = 55); and d) total stand carbon (n*  
 48 *= 60). The black lines represent prediction using the most parsimonious model coefficients and grey shading*  
 49 *the 95% confidence intervals of the coefficients (marginal  $r^2 = 0.26, 0.07, 0.13,$  and  $0.50$  for a-d, respectively).*  
 50 *Net mineralisation was measured as the amount of  $\text{NH}_4^+$  and  $\text{NO}_3^-$  taken up by a resin capsule over a four*  
 51 *month period and then divided by 4 to obtain a value per month. The different coloured points represent the*  
 52 *values at each individual site.*

53

## 54 Supplementary Methods: SM1

### 55 *Plot set-up*

56 Each plot was 20 x 20 m (400 m<sup>2</sup>; 0.04 ha). The edges were delineated with measuring tapes.  
57 A compass was used to confirm that the adjacent angles were at 90° angles. A nested sub-plot  
58 of 10 x 10 m (100 m<sup>2</sup>) was set up in the centre of each plot, laid out in the same orientation as  
59 the full plot. The centre and the corners of the sub-plot were marked with wooden stakes for  
60 easy identification on return visits. The mid-points of each plot were recorded using a  
61 handheld GPS (GPSMAP 60CSx; Garmin, USA).

62

### 63 *Structural survey*

64 The diameters at breast height (dbh) of both living and dead standing trees (snags) were  
65 measured at 1.3 m using a diameter tape pulled taut horizontally to the trunk. Following  
66 advice and procedures from Husch *et al.*<sup>1</sup> and van Laar and Akça<sup>2</sup>, specific instructions were  
67 followed when using diameter tapes for difficult trees. The combined dbhs were used to  
68 calculate the overall BA<sup>3</sup>, forming the basis of the primary criterion.

69

### 70 *Crown condition*

71 Living beech trees were further assessed for their condition, undertaken using binoculars at  
72 several points around each tree where visibility was good. The condition attributes were the  
73 potential crown loss, live growth loss, condition of the current branches and discolouration of  
74 the crown. Potential crown loss and leave loss were recorded as a percentage based on the  
75 average values provided by two observers. Similarly, condition was recorded as number (1-4)  
76 based on the descriptions. Any pathogens present were also recorded after a thorough search  
77 of the lower sections of each tree.

78

### 79 *Canopy openness*

80 At each corner of the 10 x 10 m sub-plot four readings were taken using a spherical  
81 densiometer, one in each cardinal direction, giving an overall average for that plot<sup>4</sup>.

82

### 83 *Understorey openness*

84 Understorey openness was determined the same way as canopy openness, but only for trees  
85 less than approximately 6 m in height.

86

87 *Forest biomass*

88 Following Jenkins *et al.*<sup>5</sup>, oven-dry biomass was determined in four different components of  
89 the stand; the roots, the tree stems, the branches and foliage. To calculate the total biomass of  
90 a single species, the stem biomass, crown biomass and root biomass were summed together  
91 and multiplied by the number of that species present in the plot. The total biomass of all  
92 species was then calculated by summing all individual species' biomass values. The oven-  
93 dry biomass was calculated based on specific values for broadleaves, taken from McKay *et*  
94 *al.*<sup>6</sup>.

95

96 *Carbon assessment for trees*

97 Carbon content of a plot was calculated by multiplying the oven-dry matter biomass by 0.5,  
98 the carbon fraction of biomass<sup>7</sup>.

99

100 *Herbivore pressure metrics*

101 To account for the relative presence and influence of herbivores, understorey crown  
102 condition, browseline, sward height, seedling and sapling abundance, browsing intensity,  
103 dung counts, and presence of a shrub layer were recorded.

104

105 For living trees in the understorey, crown condition (average of two different observers) was  
106 recorded based on deviation from perceived 'pristine' condition (i.e. 100%). Percentage of  
107 discolouration, percentage of leaves remaining, potential crown structure, empty branches  
108 and position of the tree were taken into account.

109

110 The browse lines of palatable (e.g. beech, oak, birch) and unpalatable (e.g. holly, hawthorn)  
111 trees were recorded if they were within the edges of the plot. Using a marked range pole, any  
112 branches that were higher than 1.8 m (a deer's maximum browse height), but lower than 2.3  
113 m (based on an average drop of 50 cm in the winter), were counted as browsed. Any branches  
114 that retained leaves below 1.8 m were counted as unbrowsed. A percentage ratio of browsed  
115 to unbrowsed was calculated. The sward height was measured using a measuring stick, based  
116 on the findings of Stewart *et al.*<sup>8</sup> This was measured in the centre and at the four corners of  
117 the sub-plot, and a mean value was recorded.

118

119 The percentages cover of mosses, bare ground, bracken, trampling and ground flora were  
120 recorded from a detailed visual assessment of each plot. Similarly, seedling (< 1.3 m in

121 height) and sapling (> 1.3 m and dbh < 10 cm) abundances were assessed through a manual  
122 search of the entire 20 x 20 m plot. Seedlings were any counted if they were older than a  
123 year, based on physical aspects.

124

125 Partial defoliation or complete consumption of plants occur through herbivore browsing, the  
126 intensity of which is commonly determined by counts of un-browsed and browsed  
127 branches<sup>9,10</sup>. This was undertaken using a random stratified design. Initially, a 2 x 2 m  
128 quadrat was placed in the most south-westerly corner of the sub-plot, continuing clockwise  
129 (NW, NE, SE) around the corners, until 100 stems had been assessed. The same technique  
130 was used for assessing bramble browsing, following Bazely *et al* <sup>11</sup>.

131

132 For estimating herbivore abundance from dung, the faecal standing crop (FSC) method, the  
133 most commonly used and efficient technique<sup>12,13</sup>, was used. A manual dung count was carried  
134 out in the sub-plot; the amount, condition and the species recorded. Following Jenkins and  
135 Manly<sup>14</sup>, the individual pellets/ bolus and their condition were recorded. The faecal matter of  
136 different animals (deer, *Equus* species, rabbits and cattle) were recorded separately.

137

#### 138 *Soil survey*

139 Following the methods of DeLuca *et al.*<sup>15</sup>, ten separate soil samples were taken in randomly-  
140 stratified positions, two from the centre and two at each corner of the nested 10 x 10 m sub-  
141 plot, for both the O horizon and A horizon soil layer (0-15 cm below the O horizon). The  
142 vegetation the sample was taken under (e.g. bracken, grass) was noted.

143

144 For bulk density (BD) measurements, three 100 cm<sup>3</sup> stainless steel rings were inserted into  
145 the soil to ensure a known volume. These were taken from the SW and NE corners and from  
146 the mid-point.

147

148 For analyses of NO<sub>3</sub><sup>-</sup> and NH<sub>4</sub><sup>+</sup>, 5 g of sieved, field-moist soil was placed into a labelled tube  
149 with 25 ml of 1 M KCl added. The soils were shaken by hand and placed horizontally on a  
150 rotary shaker for 30 minutes at 250 rev/min. The extracts were immediately filtered through a  
151 Fisher QT 210 filter paper into a labelled polypropylene vial. The filtrates were then frozen  
152 immediately and analysed two months later. Both NH<sub>4</sub><sup>+</sup> and NO<sub>3</sub><sup>-</sup> were analysed using the  
153 microplate-colorimetric technique, with the salicylate-nitroprusside method for NH<sub>4</sub><sup>+</sup>,  
154 following Mulvaney<sup>16</sup> and the vanadium method for NO<sub>3</sub><sup>-17</sup>.

155

156 To determine the potential mineralisable nitrogen concentrations, 5 g of sieved, field-moist  
157 soil was placed into a labelled tube with 25 ml of ultrapure water added. The headspace was  
158 then flushed with N<sub>2</sub> (g). The tube was sealed and incubated for 7 days at 40°C<sup>18</sup>.  
159 Immediately after incubation, 1.75 g of KCl was added to each tube. The tubes were shaken  
160 (1 hr at 200 rev/min), centrifuged and filtered immediately, using the process as for NO<sub>3</sub><sup>-</sup> and  
161 NH<sub>4</sub><sup>+</sup>. The pH and electrical conductivity of soil was determined using a 2:1 deionized water  
162 to soil ratio.

163

164 *Net N mineralisation and nitrification:*

165 To enable analysis of in-situ of nitrification and N mineralisation rates, following DeLuca *et*  
166 *al.*<sup>15</sup>, a polyester mesh ionic resin capsule (Unibest, Walla Walla, WA, USA) was buried in  
167 the centre of each plot, 10 cm deep into the mineral layer. The capsules were placed between  
168 9<sup>th</sup> October and 12<sup>th</sup> November, 2014 and were removed from the ground four months later.

169

170 The nitrogen mineralisation and nitrification of a plot were analysed through leaching of resin  
171 capsules (RC). Initially, 10 mL of 1 M KCl was placed into each tube containing a RC, which  
172 was then shaken horizontally for 30 minutes at 250 rpm. The extractant was poured into a  
173 clean storage tube. This process was repeated two more times, making a total of 30 mL of the  
174 extractant. The extractant was centrifuged at 4000 rpm for 10 minutes. 20 mL of the  
175 supernatant was then pipetted into a 30 mL polypropylene tube and frozen prior to  
176 colorimetric analysis as described above.

177

178 *Soil respiration rate:*

179 Soil respiration rate was measured using a SR-1 closed chamber Infra-red gas analyser (PP  
180 Systems, Amesbury, MA, USA). All measurements were recorded between 10:00 and 14:00  
181 on sunny days within a month of each other. After automatic flushing and calibration of the  
182 chamber, the PVC chamber was inserted 2 cm into the soil after any vegetation had been  
183 removed from the surface. The CO<sub>2</sub> concentration was measured continuously for 2 minutes.  
184 Five measurements were taken from each survey plot and then averaged to produce a mean  
185 soil respiration rate for the whole plot. Soil respiration rate was calculated as in (PP  
186 Systems<sup>19</sup>:

187

188  $R=V/A \times ((Cn-Co)/(Tn ))$



189

190 Where  $R$  is the respiration rate,  $V$  is the volume of the chamber,  $A$  is the area of soil exposed,  
191  $C_n$  is the  $\text{CO}_2$  concentration at time 0, and  $C_o$  is the  $\text{CO}_2$  concentration at time,  $T_n$  (120  
192 seconds in this study).

193

#### 194 *Soil moisture*

195 Soil moisture was measured as the difference in weight of a 5 g moist soil sample before and  
196 after oven-drying. Sieved mineral and organic samples were oven-dried at 105 °C and 80 °C,  
197 respectively, until they remained a constant weight. To measure the soil organic matter  
198 (SOM), the oven-dried samples were then placed in a 500 °C furnace overnight (12 hours),  
199 the final weight recorded after being cooled in a desiccator.  $\text{LOI} = 100 \times (\text{mass of oven-dry}$   
200  $\text{soil} - \text{mass of ignited soil}) / \text{mass of oven-dry soil} = \text{g per } 100\text{g oven-dry soil}^{20}$ . The soil was  
201 dried at 105 °C for 24 h and then sieved (2 mm) to remove stones and other non-soil material  
202 (>2 mm diameter). Bulk density was calculated by dividing soil mass (less stone mass) by  
203 core volume (less stone volume).

204

#### 205 *Soil content and structure*

206 The Forest Research (FR) team at Alice Holt Lodge, Surrey, measured the exchangeable  
207 cations/anions of K, S, Ca, Mg, Na, Al, Mn and F; total N and C, organic and inorganic C;  
208 the plant-available P; and the particle sizes of the soil from air-dried samples. Following FR  
209 methods, the exchangeable cations/anions were analysed using  $\text{BaCl}_2$  extraction (FR  
210 Reference method: ISO 11260 & 14254). First, a soil suspension of 3 g soil and 36 ml of 0.1  
211 M  $\text{BaCl}_2$  was shaken for 60 minutes, centrifuged and filtered with 0.45  $\mu\text{m}$  syringe filter.  
212 Extracts were then acidified and analysed using a dual view ICP-OES (Thermo ICap 6500  
213 duo). The Olsen P method with ADAS index was used to determine the amount of  
214 phosphorus available (FR Reference method: The analysis of Agricultural Materials MAFF  
215 3rd Edition RB427). A suspension of 5 g soil with 100 ml of sodium bicarbonate solution  
216 was buffered at pH 8.5. The solution was shaken for 30 min on an orbital shaker, centrifuged  
217 and filtered with 0.45 $\mu\text{m}$  syringe filters. Extracts were then acidified with 1.5 M sulphuric  
218 acid and mixed with a solution of ascorbic acid and ammonium molybdate for 10 min and  
219 then measured at 880 nm with a Shimadzu UV spectrophotometer. Total C and N were  
220 analysed using a Carlo Erba CN analyser (Flash1112 series) and combustion method (FR  
221 Reference method: ISO 10694 & 13878). Samples were ball-milled for homogenisation and  
222 then around 30 mg weighed in tin capsules, pressed and measured using the analyser.

223 Following, 30 g of soil was placed in a silver capsule to quantify inorganic C. The silver  
224 capsule was put furnace at 500°C for 2 hours, which removed the organic carbon. The  
225 organic carbon fraction was calculated as the difference between total carbon and inorganic  
226 carbon. The soil particle size distribution was determined using a Laser Diffraction Particle  
227 Sizer (FR Reference method: Laser diffraction); 30 g of soil were suspended in water and  
228 passed through the flow cell of the analyser (Beckman Coulter LS13320).

229

### 230 *Data analysis*

231 Random intercepts and slopes were included for each site. All the variables were tested for  
232 normal distribution with the Shapiro–Wilk test and for homogeneity of variances for  
233 Bartlett’s test<sup>21</sup>. Data that did not fit these assumptions were log-transformed prior to  
234 analysis.

235

236 Count data were modelled using a Poisson error structure. For proportional and percentage  
237 data, a small non-zero value was added to avoid infinite logit transformed values<sup>22</sup>. AICc  
238 values were calculated using the maximum likelihood value of the model<sup>23</sup>. AICc values were  
239 determined using the MuMIn R package<sup>24</sup> and used to define the most parsimonious model,  
240 following an information theoretic approach<sup>23</sup>. Performance of models was evaluated by  
241 calculating the marginal  $r^2$  <sup>25</sup>.

## 242 Supplementary Methods: SM2

### 243 *Ground-dwelling arthropods collection*

244 Pitfall trapping was carried out in five out of the 12 sites. In each site eight pitfall traps were  
245 placed on the perimeter of the 10m x 10m sub-plot; one in each corner and one midway along  
246 each edge. A soil auger was used to create holes in which plastic cups (8 cm in diameter and  
247 11 cm tall) were placed. Approximately 3 cm of propylene glycol, a cost effective  
248 preservative, was poured into each cup. Water was allowed to escape through the use of  
249 drainage holes in the top of the cups; this also prevented the trap flooding. A galvanised steel  
250 square which was supported by turned-down corners was placed over each trap. Forestry  
251 Commission staff collected the contents of each pitfall trap weekly from late May to late July  
252 2014, totalling eight collections and 56 trapping days. The arthropod material from the eight  
253 pitfall traps in each plot were pooled into a single labelled and sterilised 1 litre sample bottle  
254 and then stored in -5 °C to preserve the specimens for metabarcoding.

255

### 256 *Ground-dwelling arthropods analysis*

257 DNA metabarcoding was employed for invertebrate identification using a methodology  
258 tailored from the approach described in Yu *et al.*<sup>26</sup>. Samples were stored in absolute ethanol  
259 at 4°C, followed by the extraction of DNA using the Qiagen blood and tissue extraction kit.  
260 Polymerase Chain Reactions (PCR) were performed targeting the 658 base pair C terminal  
261 region in the gene encoding the mitochondrial cytochrome oxidase subunit I (COI); primers  
262 used for the COI region of interest were: Forward: LCO1490 (5'-  
263 GGTCACAAATCATAAAGATATTGG-3') and Reverse: mlCOIintGLR (5'-GGNGGR  
264 TANANNGTYCANCCNGYNCC-3'). Three separate PCRs were carried out for each  
265 sample. An aliquot was checked on a 1.4% agarose gel and then the PCRs pooled before  
266 library construction. A multiplex identifier (MID) tag was attached to the forward primer in  
267 addition to the relevant adaptor for the sequencing platform. The MID tag was specific to  
268 each sample and allowed multiple samples to be pooled for sequencing and then separated  
269 out bioinformatically afterwards. A touch-down thermocycling profile was used, followed by  
270 a low number of cycles with an intermediate annealing temperature. Indexing barcodes were  
271 added to the amplicons following the Illumina TruSeq Nano protocol from the 'Clean-up  
272 Fragmented DNA' stage. In a deviation from this protocol fragments were size-selected using  
273 blue Pippin size selection of the 300-670bp region to remove larger fragments. The barcoded  
274 samples were pooled into a single pool and 250bp paired end reads were generated on one

275 lane of the Illumina MiSeq platform. The pool was demultiplexed into the individual  
276 samples using the Illumina bcl2fastq (v 1.8.4bin) software. The samples were clustered into  
277 OTUs (operational taxonomic units) using the approach described in Yu *et al.*<sup>27</sup> starting with  
278 demultiplexed samples in step 1. Instead of the described step 6 of the pipeline we used the  
279 BOLD database and website for taxonomic assignment and confidence assessment. Accepted  
280 matches had to have at least 97% sequence similarity at a given taxonomic level. For this we  
281 queried the website by using a custom script that created the urls and parsed the output for  
282 each OTU. In a final step the taxonomic assignment, OTU and the number of reads of each  
283 sample mapping to the OTUs was collated into a single table. The final species lists were  
284 checked against previous records of species occurrence in Britain using primarily the  
285 National Biodiversity Networks Gateway<sup>27</sup> but also Fauna Europaea<sup>28</sup>, Antweb<sup>29</sup>, the British  
286 Arachnological Society<sup>30</sup>, and Araneae: Spiders of Europe<sup>31</sup>. Where no previous record was  
287 found to species level, occurrence in Britain to Genus level was checked.  
288

289 *Table S2: Summary of variables measured and units used.*

| Variable                                                               | Biodiversity (B), ecosystem function (EF) or ecosystem condition (EC) measure? | Units                                                                                                    |
|------------------------------------------------------------------------|--------------------------------------------------------------------------------|----------------------------------------------------------------------------------------------------------|
| Ectomycorrhizal fungi species richness                                 | B                                                                              | Unique species 0.04 ha <sup>-1</sup>                                                                     |
| Sward height                                                           | EC                                                                             | cm                                                                                                       |
| Abundance of holly seedlings                                           | EC                                                                             | Individuals 0.04 ha <sup>-1</sup>                                                                        |
| Abundance of beech seedlings                                           | EC                                                                             | Individuals 0.04 ha <sup>-1</sup>                                                                        |
| Abundance of oak seedlings                                             | EC                                                                             | Individuals 0.04 ha <sup>-1</sup>                                                                        |
| Abundance of tree seedlings                                            | EC                                                                             | Individuals 0.04 ha <sup>-1</sup>                                                                        |
| Abundance of palatable seedlings                                       | EC                                                                             | Individuals 0.04 ha <sup>-1</sup>                                                                        |
| Bulk density of the soil                                               | EC                                                                             | g cm <sup>-3</sup>                                                                                       |
| Depth of the organic layer                                             | EC                                                                             | cm                                                                                                       |
| Average diameter at breast height of beech trees                       | EC                                                                             | cm                                                                                                       |
| Average height of beech trees                                          | EC                                                                             | m                                                                                                        |
| Volume of standing deadwood in a plot                                  | EC                                                                             | m <sup>3</sup> ha <sup>-1</sup>                                                                          |
| Volume of lying deadwood in a plot                                     | EC                                                                             | m <sup>3</sup> ha <sup>-1</sup>                                                                          |
| C/N ratio of the soil                                                  | EF                                                                             | C/N ratio                                                                                                |
| Potassium exchangeable cations concentration in the mineral layer soil | EF                                                                             | cmol(+)/kg                                                                                               |
| Magnesium exchangeable cations concentration in the mineral layer soil | EF                                                                             | cmol(+)/kg                                                                                               |
| Sodium exchangeable cations concentration in the mineral layer soil    | EF                                                                             | cmol(+)/kg                                                                                               |
| Calcium exchangeable cations concentration in the mineral layer soil   | EF                                                                             | cmol(+)/kg                                                                                               |
| Manganese exchangeable cations concentration in the mineral layer soil | EF                                                                             | cmol(+)/kg                                                                                               |
| Iron exchangeable cations concentration in the mineral layer soil      | EF                                                                             | cmol(+)/kg                                                                                               |
| Aluminium exchangeable cations concentration in the mineral layer soil | EF                                                                             | cmol(+)/kg                                                                                               |
| Availability of soil phosphorus                                        | EF                                                                             | mg kg <sup>-1</sup>                                                                                      |
| Total soil nitrogen                                                    | EF                                                                             | % of soil                                                                                                |
| Total soil carbon                                                      | EF                                                                             | % of soil                                                                                                |
| Soil pH                                                                | EF                                                                             | pH                                                                                                       |
| Electrical conductivity                                                | EF                                                                             | mS m <sup>-1</sup>                                                                                       |
| Net ammonification                                                     | EF                                                                             | μg NH <sub>4</sub> <sup>+</sup> capsule <sup>-1</sup> mon <sup>-1</sup>                                  |
| Net nitrification                                                      | EF                                                                             | μg NO <sub>3</sub> <sup>-</sup> capsule <sup>-1</sup> mon <sup>-1</sup>                                  |
| Net mineralisation                                                     | EF                                                                             | μg NH <sub>4</sub> <sup>+</sup> and NO <sub>3</sub> <sup>-</sup> capsule <sup>-1</sup> mon <sup>-1</sup> |
| Soil respiration rate                                                  | EF                                                                             | μmol m <sup>-2</sup> s <sup>-1</sup>                                                                     |

|                                                    |    |                                                  |
|----------------------------------------------------|----|--------------------------------------------------|
| Soil temperature                                   | EF | °C                                               |
| Total stand carbon (vegetation, deadwood and soil) | EF | t ha <sup>-1</sup>                               |
| Aboveground biomass                                | EC | t ha <sup>-1</sup>                               |
| Soil clay percentage                               | EC | % 0-2 µm soil particles                          |
| Soil silt percentage                               | EC | % 2-63 µm soil particles                         |
| Soil sand percentage                               | EC | % 63 µm-2 mm soil particles                      |
| Bracken cover                                      | EC | % cover 0.04 ha <sup>-1</sup>                    |
| Bare ground and moss cover                         | EC | % cover 0.04 ha <sup>-1</sup>                    |
| Litter cover                                       | EC | % cover 0.04 ha <sup>-1</sup>                    |
| Grass cover                                        | EC | % cover 0.04 ha <sup>-1</sup>                    |
| Palatable tree browseline                          | EC | % browseline (above 1.8 m) 0.04 ha <sup>-1</sup> |
| Unpalatable tree browseline                        | EC | % browseline (above 1.8 m) 0.04 ha <sup>-1</sup> |
| Holly cover                                        | EC | % cover 0.04 ha <sup>-1</sup>                    |
| <i>Rubus</i> cover                                 | EC | % cover 0.04 ha <sup>-1</sup>                    |
| Holly shrubs browsed                               | EC | % browse of available plants                     |
| <i>Rubus</i> shrubs browsed                        | EC | % browse of available plants                     |
| Average crown condition                            | EC | % condition                                      |
| Understorey condition                              | EC | % condition                                      |
| Canopy openness                                    | EC | % sky visible                                    |
| Understorey openness                               | EC | % sky visible                                    |
| Tree seedling richness                             | B  | Unique species 0.04 ha <sup>-1</sup>             |
| Tree sapling richness                              | B  | Unique species 0.04 ha <sup>-1</sup>             |
| Spider species richness                            | B  | Unique species 0.04 ha <sup>-1</sup>             |
| Rove beetles species richness                      | B  | Unique species 0.04 ha <sup>-1</sup>             |
| Carabid beetles species richness                   | B  | Unique species 0.04 ha <sup>-1</sup>             |
| Ant species richness                               | B  | Unique species 0.04 ha <sup>-1</sup>             |
| Weevil species richness                            | B  | Unique species 0.04 ha <sup>-1</sup>             |
| Woodlice species richness                          | B  | Unique species 0.04 ha <sup>-1</sup>             |
| Ground-dwelling arthropod species richness         | B  | Unique species 0.04 ha <sup>-1</sup>             |
| Moisture content of the mineral layer              | EF | % soil moisture                                  |
| Moisture content of the organic layer              | EF | % soil moisture                                  |
| <i>Cervus</i> dung proportional                    | EC | see Jenkins and Manly (2008)                     |
| <i>Equus</i> dung proportional                     | EC | see Jenkins and Manly (2008)                     |
| Proportional dung total                            | EC | see Jenkins and Manly (2008)                     |
| Very large beech trees (74.97 cm < dbh < 103 cm)   | EC | Individuals 0.04 ha <sup>-1</sup>                |
| Large beech trees (68.32 cm < dbh < 74.97 cm)      | EC | Individuals 0.04 ha <sup>-1</sup>                |

|                                                         |    |                                      |
|---------------------------------------------------------|----|--------------------------------------|
| Holly tree abundance                                    | EC | Individuals 0.04 ha <sup>-1</sup>    |
| Beech trees abundance                                   | EC | Individuals 0.04 ha <sup>-1</sup>    |
| Holly saplings abundance                                | EC | Individuals 0.04 ha <sup>-1</sup>    |
| Beech saplings abundance                                | EC | Individuals 0.04 ha <sup>-1</sup>    |
| Overall saplings abundance                              | EC | Individuals 0.04 ha <sup>-1</sup>    |
| Ground flora species richness                           | B  | Unique species 0.04 ha <sup>-1</sup> |
| Woody ground flora species richness                     | B  | Unique species 0.04 ha <sup>-1</sup> |
| Non-woody ground flora species richness                 | B  | Unique species 0.04 ha <sup>-1</sup> |
| Lichen species richness                                 | B  | Unique species 0.04 ha <sup>-1</sup> |
| Lichen species richness on holly                        | B  | Unique species 0.04 ha <sup>-1</sup> |
| Lichen species richness on beech                        | B  | Unique species 0.04 ha <sup>-1</sup> |
| Organic layer loss on ignition                          | EC | % weight loss                        |
| Mineral layer loss on ignition                          | EC | % weight loss                        |
| Organic layer nitrate concentration                     | EF | mg kg <sup>-1</sup>                  |
| Mineral layer nitrate concentration                     | EF | mg kg <sup>-1</sup>                  |
| Organic layer ammonium concentration                    | EF | mg kg <sup>-1</sup>                  |
| Mineral layer ammonium concentration                    | EF | mg kg <sup>-1</sup>                  |
| Potentially mineralisable nitrogen of the organic layer | EF | µg g <sup>-1</sup>                   |
| Potentially mineralisable nitrogen of the mineral layer | EF | µg g <sup>-1</sup>                   |
| Understorey biomass                                     | EC | t ha <sup>-1</sup>                   |

290 *Table S3: Generalised linear mixed models used to determine whether a threshold was exhibited in all the response variables and associated*  
 291 *measures of parsimony (AICc), support ( $\Delta$ AICc, AICc weight) and goodness of fit (Marginal  $r^2$ ). Mod\_cont\_NL specifies that the model*  
 292 *contained a linear and quadratic term of BA loss indicating a non-linear response; Mod\_cont specifies that the model only contained a linear*  
 293 *term of BA loss indicating a linear response; and Modnull1 specifies that the model indicated little or no change over the gradient of BA loss.*

| Response variable                             | Name        | Model structure                                  | df | Log likelihood | AICc     | $\Delta$ AICc | AICc weight | Marginal $r^2$ | Threshold? |
|-----------------------------------------------|-------------|--------------------------------------------------|----|----------------|----------|---------------|-------------|----------------|------------|
| <b>Ectomycorrhizal fungi species richness</b> | Mod_cont_NL | BA decline + BA decline <sup>2</sup>             | 4  | -149.400       | 307.526  | 0.000         | 0.984       | 0.568          | Yes        |
|                                               | Mod_cont    | BA decline                                       | 3  | -154.700       | 315.824  | 8.298         | 0.016       | 0.463          |            |
|                                               | Modnull1    | Null model                                       | 2  | -185.130       | 374.476  | 66.949        | 0.000       | 0.000          |            |
| <b>Sward height</b>                           | Mod_cont_NL | BA decline + BA decline <sup>2</sup>             | 5  | -264.500       | 540.106  | 0.000         | 1.000       | 0.507          | Yes        |
|                                               | Mod_cont    | BA decline                                       | 4  | -274.560       | 557.849  | 17.743        | 0.000       | 0.416          |            |
|                                               | Modnull1    | Null model                                       | 3  | -294.110       | 594.648  | 54.542        | 0.000       | 0.000          |            |
| <b>Abundance of holly seedlings</b>           | Mod_cont_NL | BA decline + BA decline <sup>2</sup> + log(Dung) | 5  | -1332.800      | 2676.800 | 0.000         | 1.000       | 0.119          | No         |
|                                               | Mod_cont    | BA decline + log(Dung)                           | 4  | -1844.600      | 3697.830 | 1021.030      | 0.000       | 0.047          |            |
|                                               | Modnull1    | Null model                                       | 3  | -1891.800      | 3790.040 | 1113.250      | 0.000       | 0.007          |            |
| <b>Abundance of beech seedlings</b>           | Mod_cont_NL | BA decline + BA decline <sup>2</sup> + log(Dung) | 5  | -275.660       | 562.439  | 0.000         | 1.000       | 0.216          | Yes        |
|                                               | Mod_cont    | BA decline + log(Dung)                           | 4  | -297.960       | 604.637  | 42.198        | 0.000       | 0.169          |            |
|                                               | Modnull1    | Null model                                       | 3  | -331.090       | 668.610  | 106.172       | 0.000       | 0.015          |            |



|                                             |             |                                                  |   |           |          |          |       |       |     |
|---------------------------------------------|-------------|--------------------------------------------------|---|-----------|----------|----------|-------|-------|-----|
| <b>Abundance of oak seedlings</b>           | Mod_cont_NL | BA decline+ BA decline <sup>2</sup> + log(Dung)  | 5 | -50.194   | 111.499  | 0.000    | 0.998 | 0.455 | Yes |
|                                             | Mod_cont    | BA decline + log(Dung)                           | 4 | -57.726   | 124.178  | 12.679   | 0.002 | 0.176 |     |
|                                             | Modnull1    | Null model                                       | 3 | -62.773   | 131.974  | 20.474   | 0.000 | 0.035 |     |
| <b>Abundance of tree seedlings</b>          | Mod_cont_NL | BA decline+ BA decline <sup>2</sup> + log(Dung)  | 5 | -1372.800 | 2756.790 | 0.000    | 1.000 | 0.134 | No  |
|                                             | Mod_cont    | BA decline + log(Dung)                           | 4 | -1902.900 | 3814.570 | 1057.780 | 0.000 | 0.051 |     |
|                                             | Modnull1    | Null model                                       | 3 | -1967.100 | 3940.640 | 1183.850 | 0.000 | 0.001 |     |
| <b>Abundance of palatable seedlings</b>     | Mod_cont_NL | BA decline + BA decline <sup>2</sup> + log(Dung) | 5 | -265.390  | 541.900  | 0.000    | 1.000 | 0.294 | Yes |
|                                             | Mod_cont    | BA decline + log(Dung)                           | 4 | -294.340  | 597.407  | 55.507   | 0.000 | 0.226 |     |
|                                             | Modnull1    | Null model                                       | 3 | -332.490  | 671.411  | 129.511  | 0.000 | 0.004 |     |
| <b>Bulk density of the soil</b>             | Modnull1    | Null model                                       | 3 | 17.940    | -29.452  | 0.000    | 0.828 | 0.000 | No  |
|                                             | Mod_cont    | BA decline                                       | 4 | 17.350    | -25.973  | 3.479    | 0.145 | 0.033 |     |
|                                             | Mod_cont_NL | BA decline + BA decline <sup>2</sup>             | 5 | 16.840    | -22.568  | 6.883    | 0.027 | 0.038 |     |
| <b>Depth of the organic layer</b>           | Modnull1    | Null model                                       | 3 | -26.750   | 59.929   | 0.000    | 0.740 | 0.000 | No  |
|                                             | Mod_cont    | BA decline                                       | 4 | -27.262   | 63.251   | 3.322    | 0.141 | 0.016 |     |
|                                             | Mod_cont_NL | BA decline + BA decline <sup>2</sup>             | 5 | -26.234   | 63.580   | 3.651    | 0.119 | 0.038 |     |
| <b>Average diameter at breast height of</b> | Mod_cont_NL | BA decline + BA decline <sup>2</sup>             | 5 | -182.940  | 377.303  | 0.000    | 0.949 | 0.007 | No  |

|                                                                          |             |                                           |   |          |          |        |       |       |    |
|--------------------------------------------------------------------------|-------------|-------------------------------------------|---|----------|----------|--------|-------|-------|----|
| <b>beech trees</b>                                                       | Mod_cont    | BA decline                                | 4 | -187.300 | 383.531  | 6.228  | 0.042 | 0.003 |    |
|                                                                          | Modnull1    | Null model                                | 3 | -190.100 | 386.737  | 9.434  | 0.008 | 0.000 |    |
| <b>Average height of beech trees</b>                                     | Mod_cont_NL | BA decline + BA decline <sup>2</sup>      | 5 | -150.090 | 311.599  | 0.000  | 0.907 | 0.046 | No |
|                                                                          | Mod_cont    | BA decline                                | 4 | -153.720 | 316.376  | 4.777  | 0.083 | 0.044 |    |
|                                                                          | Modnull1    | Null model                                | 3 | -157.010 | 320.567  | 8.968  | 0.010 | 0.000 |    |
| <b>Volume of standing deadwood in a plot</b>                             | Mod_cont_NL | BA decline + BA decline <sup>2</sup>      | 5 | -606.230 | 1223.580 | 0.000  | 1.000 | 0.043 | No |
|                                                                          | Mod_cont    | BA decline                                | 4 | -616.500 | 1241.730 | 18.148 | 0.000 | 0.042 |    |
|                                                                          | Modnull1    | Null model                                | 3 | -627.000 | 1260.420 | 36.843 | 0.000 | 0.000 |    |
| <b>Volume of lying deadwood in a plot</b>                                | Mod_cont_NL | BA decline + BA decline <sup>2</sup>      | 5 | -74.148  | 159.407  | 0.000  | 0.548 | 0.448 | No |
|                                                                          | Mod_cont    | BA decline                                | 4 | -75.534  | 159.796  | 0.388  | 0.452 | 0.443 |    |
|                                                                          | Modnull1    | Null model                                | 3 | -93.483  | 193.394  | 33.987 | 0.000 | 0.000 |    |
| <b>C/N ratio of the soil</b>                                             | Mod_cont_NL | BA decline + BA decline <sup>2</sup> + pH | 5 | -154.330 | 319.770  | 0.000  | 0.775 | 0.060 | No |
|                                                                          | Mod_cont    | BA decline + pH                           | 4 | -156.800 | 322.325  | 2.555  | 0.216 | 0.056 |    |
|                                                                          | Modnull1    | Null model                                | 3 | -161.110 | 328.647  | 8.877  | 0.009 | 0.000 |    |
| <b>Potassium exchangeable cations concentration in the mineral layer</b> | Modnull1    | Null model                                | 3 | 76.590   | -146.750 | 0.000  | 0.513 | 0.199 | No |
|                                                                          | Mod_cont    | BA decline + pH                           | 4 | 77.626   | -146.530 | 0.225  | 0.458 | 0.317 |    |

|                                                                                                   |             |                                                 |   |          |          |        |       |       |    |
|---------------------------------------------------------------------------------------------------|-------------|-------------------------------------------------|---|----------|----------|--------|-------|-------|----|
| <b>soil</b>                                                                                       | Mod_cont_NL | BA decline<br>+ BA decline <sup>2</sup><br>+ pH | 5 | 76.036   | -140.960 | 5.791  | 0.028 | 0.316 |    |
| <b>Magnesium<br/>exchangeable<br/>cations<br/>concentration in<br/>the mineral layer<br/>soil</b> | Mod_cont_NL | BA decline<br>+ BA decline <sup>2</sup><br>+ pH | 6 | -105.070 | 223.724  | 0.000  | 0.546 | 0.035 | No |
|                                                                                                   | Mod_cont    | BA decline<br>+ pH                              | 5 | -106.550 | 224.220  | 0.495  | 0.426 | 0.035 |    |
|                                                                                                   | Modnull1    | Null model                                      | 3 | -111.600 | 229.631  | 5.907  | 0.028 | 0.000 |    |
| <b>Sodium<br/>exchangeable<br/>cations<br/>concentration in<br/>the mineral layer<br/>soil</b>    | Mod_cont    | BA decline<br>+ pH                              | 5 | 110.275  | -209.440 | 0.000  | 0.969 | 0.335 | No |
|                                                                                                   | Mod_cont_NL | BA decline<br>+ BA decline <sup>2</sup><br>+ pH | 6 | 107.980  | -202.380 | 7.063  | 0.028 | 0.332 |    |
|                                                                                                   | Modnull1    | Null model                                      | 3 | 102.076  | -197.720 | 11.715 | 0.003 | 0.000 |    |
| <b>Calcium<br/>exchangeable<br/>cations<br/>concentration in<br/>the mineral layer<br/>soil</b>   | Mod_cont    | BA decline<br>+ pH                              | 5 | 17.362   | -23.612  | 0.000  | 0.845 | 0.175 | No |
|                                                                                                   | Mod_cont_NL | BA decline<br>+ BA decline <sup>2</sup><br>+ pH | 6 | 16.642   | -19.699  | 3.914  | 0.119 | 0.173 |    |
|                                                                                                   | Modnull1    | Null model                                      | 3 | 11.842   | -17.256  | 6.356  | 0.035 | 0.000 |    |
| <b>Manganese<br/>exchangeable<br/>cations<br/>concentration in<br/>the mineral layer<br/>soil</b> | Modnull1    | Null model                                      | 3 | 88.883   | -171.340 | 0.000  | 0.983 | 0.065 | No |
|                                                                                                   | Mod_cont    | BA decline<br>+ pH                              | 4 | 85.913   | -163.100 | 8.238  | 0.016 | 0.065 |    |
|                                                                                                   | Mod_cont_NL | BA decline<br>+ BA decline <sup>2</sup><br>+ pH | 5 | 84.722   | -158.330 | 13.006 | 0.001 | 0.085 |    |

|                                                                               |             |                                           |   |          |          |        |       |       |    |
|-------------------------------------------------------------------------------|-------------|-------------------------------------------|---|----------|----------|--------|-------|-------|----|
| <b>Iron exchangeable cations concentration in the mineral layer soil</b>      | Mod_cont_NL | BA decline + BA decline <sup>2</sup> + pH | 5 | -268.340 | 547.793  | 0.000  | 0.974 | 0.085 | No |
|                                                                               | Mod_cont    | BA decline + pH                           | 4 | -273.180 | 555.087  | 7.294  | 0.025 | 0.072 |    |
|                                                                               | Modnull1    | Null model                                | 3 | -279.190 | 564.801  | 17.008 | 0.000 | 0.000 |    |
| <b>Aluminium exchangeable cations concentration in the mineral layer soil</b> | Modnull1    | Null model                                | 3 | -38.524  | 83.476   | 0.000  | 0.511 | 0.000 | No |
|                                                                               | Mod_cont    | BA decline + pH                           | 4 | -37.721  | 84.169   | 0.693  | 0.362 | 0.031 |    |
|                                                                               | Mod_cont_NL | BA decline + BA decline <sup>2</sup> + pH | 5 | -37.576  | 86.262   | 2.786  | 0.127 | 0.031 |    |
| <b>Availability of soil phosphorus</b>                                        | Modnull1    | Null model                                | 3 | 72.697   | -138.970 | 0.000  | 0.982 | 0.000 | No |
|                                                                               | Mod_cont    | BA decline + pH                           | 4 | 69.793   | -130.860 | 8.108  | 0.017 | 0.000 |    |
|                                                                               | Mod_cont_NL | BA decline + BA decline <sup>2</sup> + pH | 5 | 68.117   | -125.120 | 13.844 | 0.001 | 0.000 |    |
| <b>Total soil nitrogen</b>                                                    | Modnull1    | Null model                                | 3 | -61.364  | 129.156  | 0.000  | 0.931 | 0.000 | No |
|                                                                               | Mod_cont    | BA decline + pH                           | 5 | -62.091  | 135.293  | 6.137  | 0.043 | 0.007 |    |
|                                                                               | Mod_cont_NL | BA decline + BA decline <sup>2</sup> + pH | 6 | -61.363  | 136.312  | 7.156  | 0.026 | 0.009 |    |
| <b>Total soil carbon</b>                                                      | Mod_cont_NL | BA decline + BA decline <sup>2</sup> + pH | 6 | -228.010 | 469.603  | 0.000  | 0.943 | 0.076 | No |

|                                |              |                                                 |   |          |          |        |       |       |    |
|--------------------------------|--------------|-------------------------------------------------|---|----------|----------|--------|-------|-------|----|
|                                | Mod_cont     | BA decline<br>+ pH                              | 5 | -232.050 | 475.208  | 5.605  | 0.057 | 0.068 |    |
|                                | Modnull1     | Null model                                      | 3 | -240.080 | 486.589  | 16.986 | 0.000 | 0.000 |    |
| <b>Soil pH</b>                 | Modnull1     | Null model                                      | 3 | -16.753  | 39.934   | 0.000  | 0.853 | 0.000 | No |
|                                | Mod_cont_NL  | BA decline<br>+ BA decline <sup>2</sup>         | 5 | -16.862  | 44.835   | 4.901  | 0.074 | 0.037 |    |
|                                | Mod_cont     | BA decline                                      | 4 | -18.058  | 44.844   | 4.909  | 0.073 | 0.000 |    |
| <b>Electrical conductivity</b> | Modnull1     | Null model                                      | 3 | 219.607  | -432.790 | 0.000  | 0.996 | 0.105 | No |
|                                | Mod_cont     | BA decline                                      | 4 | 215.273  | -421.820 | 10.966 | 0.004 | 0.136 |    |
|                                | Mod_cont_NL  | BA decline<br>+ BA decline <sup>2</sup>         | 5 | 213.517  | -415.920 | 16.863 | 0.000 | 0.213 |    |
| <b>Net ammonification</b>      | Modnull1     | Null model                                      | 3 | -88.247  | 182.964  | 0.000  | 0.484 | 0.047 | No |
|                                | Mod_cont_NL  | BA decline<br>+ BA decline <sup>2</sup>         | 5 | -86.432  | 184.088  | 1.125  | 0.276 | 0.052 |    |
|                                | Mod_cont     | BA decline                                      | 4 | -87.779  | 184.358  | 1.394  | 0.241 | 0.057 |    |
| <b>Net nitrification</b>       | Mod_cont_NL  | BA decline<br>+ BA decline <sup>2</sup>         | 5 | -90.104  | 191.433  | 0.000  | 0.531 | 0.104 | No |
|                                | Mod_cont     | BA decline                                      | 4 | -91.485  | 191.770  | 0.337  | 0.449 | 0.103 |    |
|                                | Modnull1     | Null model                                      | 3 | -95.775  | 198.020  | 6.587  | 0.020 | 0.000 |    |
| <b>Net mineralisation</b>      | Mod_cont_NL2 | BA decline<br>+ BA decline <sup>2</sup><br>+ pH | 6 | -118.420 | 250.589  | 0.000  | 0.532 | 0.069 | No |
|                                | Mod_cont2    | BA decline<br>+ pH                              | 5 | -120.620 | 252.466  | 1.877  | 0.208 | 0.064 |    |
|                                | Mod_cont_NL  | BA decline<br>+ BA decline <sup>2</sup>         | 5 | -120.970 | 253.168  | 2.579  | 0.147 | 0.065 |    |
|                                | Mod_cont     | BA decline                                      | 4 | -123.250 | 255.303  | 4.715  | 0.050 | 0.056 |    |

|                                                           |             |                                      |   |          |          |        |       |       |     |
|-----------------------------------------------------------|-------------|--------------------------------------|---|----------|----------|--------|-------|-------|-----|
|                                                           | Modnull1    | Null model                           | 3 | -125.970 | 258.414  | 7.825  | 0.011 | 0.000 |     |
| <b>Soil respiration rate</b>                              | Mod_cont_NL | BA decline + BA decline <sup>2</sup> | 5 | -80.996  | 173.100  | 0.000  | 0.684 | 0.155 | Yes |
|                                                           | Mod_cont    | BA decline                           | 4 | -84.043  | 176.800  | 3.710  | 0.216 | 0.103 |     |
|                                                           | Modnull1    | Null model                           | 3 | -87.376  | 181.200  | 8.080  | 0.100 | 0.000 |     |
| <b>Soil temperature</b>                                   | Mod_cont_NL | BA decline + BA decline <sup>2</sup> | 5 | -99.623  | 210.356  | 0.000  | 0.739 | 0.136 | No  |
|                                                           | Mod_cont    | BA decline                           | 4 | -101.860 | 212.443  | 2.087  | 0.260 | 0.122 |     |
|                                                           | Modnull1    | Null model                           | 3 | -108.710 | 223.845  | 13.488 | 0.001 | 0.000 |     |
| <b>Total stand carbon (vegetation, deadwood and soil)</b> | Mod_cont    | BA decline                           | 4 | 266.419  | -524.110 | 0.000  | 0.639 | 0.501 | No  |
|                                                           | Mod_cont_NL | BA decline + BA decline <sup>2</sup> | 5 | 267.038  | -522.970 | 1.145  | 0.361 | 0.584 |     |
|                                                           | Modnull1    | Null model                           | 3 | 251.796  | -497.160 | 26.946 | 0.000 | 0.000 |     |
| <b>Aboveground biomass</b>                                | Mod_cont    | BA decline                           | 4 | -340.950 | 690.621  | 8.496  | 0.014 | 0.537 | No  |
|                                                           | Mod_cont_NL | BA decline + BA decline <sup>2</sup> | 5 | -335.510 | 682.124  | 0.000  | 0.986 | 0.534 |     |
|                                                           | Modnull1    | Null model                           | 3 | -372.150 | 750.723  | 68.599 | 0.000 | 0.000 |     |
| <b>Soil clay percentage</b>                               | Modnull1    | Null model                           | 3 | -16.773  | 39.975   | 0.000  | 0.896 | 0.000 | No  |
|                                                           | Mod_cont    | BA decline                           | 4 | -18.002  | 44.730   | 4.756  | 0.083 | 0.003 |     |
|                                                           | Mod_cont_NL | BA decline + BA decline <sup>2</sup> | 5 | -18.164  | 47.439   | 7.465  | 0.021 | 0.004 |     |
| <b>Soil silt percentage</b>                               | Modnull1    | Null model                           | 3 | 2.618    | 1.193    | 0.000  | 0.718 | 0.000 | No  |
|                                                           | Mod_cont    | BA decline                           | 4 | 2.658    | 3.411    | 2.218  | 0.237 | 0.043 |     |

|                                       |             |                                         |   |          |         |        |       |       |    |
|---------------------------------------|-------------|-----------------------------------------|---|----------|---------|--------|-------|-------|----|
|                                       | Mod_cont_NL | BA decline<br>+ BA decline <sup>2</sup> | 5 | 2.195    | 6.721   | 5.528  | 0.045 | 0.043 |    |
| <b>Soil sand<br/>percentage</b>       | Modnull1    | Null model                              | 3 | -20.488  | 47.404  | 0.000  | 0.823 | 0.000 | No |
|                                       | Mod_cont    | BA decline                              | 4 | -21.116  | 50.958  | 3.554  | 0.139 | 0.014 |    |
|                                       | Mod_cont_NL | BA decline<br>+ BA decline <sup>2</sup> | 5 | -21.213  | 53.536  | 6.133  | 0.038 | 0.014 |    |
| <b>Bracken cover</b>                  | Mod_cont_NL | BA decline<br>+ BA decline <sup>2</sup> | 5 | -137.020 | 285.155 | 0.000  | 0.711 | 0.245 | No |
|                                       | Mod_cont    | BA decline                              | 4 | -139.110 | 286.952 | 1.797  | 0.289 | 0.245 |    |
|                                       | Modnull1    | Null model                              | 3 | -150.300 | 307.035 | 21.880 | 0.000 | 0.000 |    |
| <b>Bare ground and<br/>moss cover</b> | Mod_cont_NL | BA decline<br>+ BA decline <sup>2</sup> | 5 | -101.160 | 213.425 | 0.000  | 0.769 | 0.199 | No |
|                                       | Mod_cont    | BA decline                              | 4 | -103.560 | 215.847 | 2.422  | 0.229 | 0.175 |    |
|                                       | Modnull1    | Null model                              | 3 | -109.540 | 225.517 | 12.092 | 0.002 | 0.000 |    |
| <b>Litter cover</b>                   | Mod_cont_NL | BA decline<br>+ BA decline <sup>2</sup> | 5 | -119.170 | 249.446 | 0.000  | 0.718 | 0.646 | No |
|                                       | Mod_cont    | BA decline                              | 4 | -121.300 | 251.319 | 1.873  | 0.282 | 0.645 |    |
|                                       | Modnull1    | Null model                              | 3 | -159.070 | 324.574 | 75.129 | 0.000 | 0.000 |    |
| <b>Grass cover</b>                    | Mod_cont    | BA decline                              | 4 | 9.434    | -10.140 | 0.000  | 0.819 | 0.161 | No |
|                                       | Mod_cont_NL | BA decline<br>+ BA decline <sup>2</sup> | 5 | 9.080    | -7.049  | 3.091  | 0.175 | 0.164 |    |
|                                       | Modnull1    | Null model                              | 3 | 3.389    | -0.350  | 9.790  | 0.006 | 0.000 |    |
| <b>Palatable tree<br/>browseline</b>  | Mod_cont_NL | BA decline<br>+ BA decline <sup>2</sup> | 5 | -94.720  | 200.979 | 0.000  | 0.556 | 0.028 | No |
|                                       | Mod_cont    | BA decline                              | 4 | -96.760  | 202.519 | 1.541  | 0.257 | 0.028 |    |

|                                        |             |                                         |   |          |         |       |       |       |    |
|----------------------------------------|-------------|-----------------------------------------|---|----------|---------|-------|-------|-------|----|
|                                        | Modnull1    | Null model                              | 3 | -98.285  | 203.155 | 2.176 | 0.187 | 0.000 |    |
| <b>Unpalatable tree<br/>browseline</b> | Mod_cont_NL | BA decline<br>+ BA decline <sup>2</sup> | 5 | -112.050 | 235.380 | 0.000 | 0.602 | 0.035 | No |
|                                        | Mod_cont    | BA decline                              | 4 | -114.080 | 237.002 | 1.622 | 0.268 | 0.031 |    |
|                                        | Modnull1    | Null model                              | 3 | -115.980 | 238.449 | 3.069 | 0.130 | 0.000 |    |
| <b>Holly cover</b>                     | Modnull1    | Null model                              | 3 | -66.398  | 139.445 | 0.000 | 0.471 | 0.000 | No |
|                                        | Mod_cont_NL | BA decline<br>+ BA decline <sup>2</sup> | 5 | -64.272  | 140.258 | 0.813 | 0.313 | 0.005 |    |
|                                        | Mod_cont    | BA decline                              | 4 | -65.945  | 141.002 | 1.557 | 0.216 | 0.002 |    |
| <b>Rubus cover</b>                     | Mod_cont_NL | BA decline<br>+ BA decline <sup>2</sup> | 5 | -71.326  | 154.366 | 0.000 | 0.622 | 0.184 | No |
|                                        | Mod_cont    | BA decline                              | 4 | -73.140  | 155.391 | 1.025 | 0.373 | 0.188 |    |
|                                        | Modnull1    | Null model                              | 3 | -78.591  | 163.832 | 9.466 | 0.005 | 0.000 |    |
| <b>Holly shrubs<br/>browsed</b>        | Modnull1    | Null model                              | 3 | -58.867  | 124.163 | 0.000 | 0.407 | 0.000 | No |
|                                        | Mod_cont    | BA decline                              | 4 | -57.975  | 124.677 | 0.514 | 0.315 | 0.047 |    |
|                                        | Mod_cont_NL | BA decline<br>+ BA decline <sup>2</sup> | 5 | -56.907  | 124.926 | 0.763 | 0.278 | 0.059 |    |
| <b>Rubus shrubs<br/>browsed</b>        | Mod_cont_NL | BA decline<br>+ BA decline <sup>2</sup> | 5 | -73.077  | 157.868 | 0.000 | 0.831 | 0.129 | No |
|                                        | Mod_cont    | BA decline                              | 4 | -76.250  | 161.611 | 3.744 | 0.128 | 0.076 |    |
|                                        | Modnull1    | Null model                              | 3 | -78.612  | 163.873 | 6.005 | 0.041 | 0.000 |    |
| <b>Average crown<br/>condition</b>     | Mod_cont    | BA decline                              | 4 | 9.554    | -10.177 | 0.000 | 0.639 | 0.156 | No |
|                                        | Mod_cont_NL | BA decline<br>+ BA decline <sup>2</sup> | 5 | 9.691    | -7.954  | 2.224 | 0.210 | 0.155 |    |
|                                        | Modnull1    | Null model                              | 3 | 6.921    | -7.296  | 2.881 | 0.151 | 0.000 |    |
| <b>Understorey</b>                     | Modnull1    | Null model                              | 3 | -19.867  | 46.350  | 0.000 | 0.829 | 0.000 | No |



|                                      |             |                                         |   |          |         |         |       |       |     |
|--------------------------------------|-------------|-----------------------------------------|---|----------|---------|---------|-------|-------|-----|
| <b>condition</b>                     | Mod_cont    | BA decline                              | 4 | -20.713  | 50.478  | 4.128   | 0.105 | 0.004 |     |
|                                      | Mod_cont_NL | BA decline<br>+ BA decline <sup>2</sup> | 5 | -19.898  | 51.418  | 5.068   | 0.066 | 0.028 |     |
| <b>Canopy openness</b>               | Mod_cont_NL | BA decline<br>+ BA decline <sup>2</sup> | 5 | -43.877  | 98.866  | 0.000   | 0.988 | 0.886 |     |
|                                      | Mod_cont    | BA decline                              | 4 | -49.514  | 107.756 | 8.890   | 0.012 | 0.872 | Yes |
|                                      | Modnull1    | Null model                              | 3 | -112.800 | 232.025 | 133.159 | 0.000 | 0.000 |     |
| <b>Understorey openness</b>          | Mod_cont_NL | BA decline<br>+ BA decline <sup>2</sup> | 5 | -115.730 | 242.573 | 0.000   | 0.602 | 0.292 |     |
|                                      | Mod_cont    | BA decline                              | 4 | -117.340 | 243.401 | 0.828   | 0.398 | 0.295 | No  |
|                                      | Modnull1    | Null model                              | 3 | -130.790 | 268.004 | 25.431  | 0.000 | 0.000 |     |
| <b>Tree seedling richness</b>        | Mod_cont    | BA decline                              | 3 | -102.420 | 211.273 | 0.000   | 0.732 | 0.195 |     |
|                                      | Mod_cont_NL | BA decline<br>+ BA decline <sup>2</sup> | 4 | -102.290 | 213.301 | 2.028   | 0.265 | 0.209 | No  |
|                                      | Modnull1    | Null model                              | 2 | -109.100 | 222.414 | 11.141  | 0.003 | 0.000 |     |
| <b>Tree sapling richness</b>         | Modnull1    | Null model                              | 2 | -62.582  | 129.375 | 0.000   | 0.693 | 0.000 |     |
|                                      | Mod_cont    | BA decline                              | 3 | -62.561  | 131.551 | 2.176   | 0.233 | 0.001 | No  |
|                                      | Mod_cont_NL | BA decline<br>+ BA decline <sup>2</sup> | 4 | -62.561  | 133.850 | 4.475   | 0.074 | 0.001 |     |
| <b>Spider species richness</b>       | Mod_cont    | BA decline                              | 3 | -55.813  | 118.769 | 0.000   | 0.496 | 0.138 |     |
|                                      | Modnull1    | Null model                              | 2 | -57.636  | 119.817 | 1.048   | 0.294 | 0.000 | No  |
|                                      | Mod_cont_NL | BA decline<br>+ BA decline <sup>2</sup> | 4 | -55.245  | 120.490 | 1.721   | 0.210 | 0.189 |     |
| <b>Rove beetles species richness</b> | Modnull1    | Null model                              | 2 | -50.365  | 105.276 | 0.000   | 0.595 | 0.000 | No  |
|                                      | Mod_cont_NL | BA decline                              | 4 | -48.635  | 107.270 | 1.994   | 0.220 | 0.134 |     |

|                                                   |             |                                         |   |         |         |        |       |       |    |
|---------------------------------------------------|-------------|-----------------------------------------|---|---------|---------|--------|-------|-------|----|
|                                                   |             | + BA decline <sup>2</sup>               |   |         |         |        |       |       |    |
|                                                   | Mod_cont    | BA decline                              | 3 | -50.232 | 107.607 | 2.331  | 0.185 | 0.012 |    |
| <b>Carabid beetles species richness</b>           | Modnull1    | Null model                              | 2 | -51.530 | 107.606 | 0.000  | 0.614 | 0.000 | No |
|                                                   | Mod_cont    | BA decline                              | 3 | -51.005 | 109.153 | 1.547  | 0.283 | 0.046 |    |
|                                                   | Mod_cont_NL | BA decline<br>+ BA decline <sup>2</sup> | 4 | -50.590 | 111.179 | 3.573  | 0.103 | 0.086 |    |
| <b>Ant species richness</b>                       | Mod_cont    | BA decline                              | 3 | -37.656 | 82.455  | 0.000  | 0.775 | 0.484 | No |
|                                                   | Mod_cont_NL | BA decline                              | 4 | -37.467 | 84.933  | 2.479  | 0.224 | 0.529 |    |
|                                                   | Modnull1    | Null model                              | 2 | -45.428 | 95.401  | 12.946 | 0.001 | 0.000 |    |
| <b>Weevil species richness</b>                    | Modnull1    | Null model                              | 2 | -28.533 | 61.611  | 0.000  | 0.724 | 0.000 | No |
|                                                   | Mod_cont    | BA decline                              | 3 | -28.485 | 64.113  | 2.502  | 0.207 | 0.006 |    |
|                                                   | Mod_cont_NL | BA decline<br>+ BA decline <sup>2</sup> | 4 | -28.165 | 66.330  | 4.719  | 0.068 | 0.048 |    |
| <b>Woodlice species richness</b>                  | Modnull1    | Null model                              | 2 | -37.242 | 79.029  | 0.000  | 0.732 | 0.000 | No |
|                                                   | Mod_cont    | BA decline                              | 3 | -37.226 | 81.595  | 2.566  | 0.203 | 0.002 |    |
|                                                   | Mod_cont_NL | BA decline<br>+ BA decline <sup>2</sup> | 4 | -36.943 | 83.887  | 4.857  | 0.065 | 0.029 |    |
| <b>Ground-dwelling arthropod species richness</b> | Mod_cont    | BA decline                              | 3 | -69.500 | 146.150 | 0.000  | 0.740 | 0.264 | No |
|                                                   | Mod_cont_NL | BA decline<br>+ BA decline <sup>2</sup> | 4 | -69.280 | 148.560 | 2.410  | 0.220 | 0.283 |    |

|                                              |             |                                      |   |           |          |         |       |       |    |
|----------------------------------------------|-------------|--------------------------------------|---|-----------|----------|---------|-------|-------|----|
|                                              | Modnull1    | Null model                           | 2 | -73.720   | 151.980  | 5.840   | 0.040 | 0.000 |    |
| <b>Moisture content of the mineral layer</b> | Mod_cont_NL | BA decline + BA decline <sup>2</sup> | 5 | -208.680  | 428.469  | 0.000   | 0.909 | 0.026 | No |
|                                              | Mod_cont    | BA decline                           | 4 | -212.410  | 433.539  | 5.070   | 0.072 | 0.013 |    |
|                                              | Modnull1    | Null model                           | 3 | -214.890  | 436.202  | 7.733   | 0.019 | 0.000 |    |
| <b>Moisture content of the organic layer</b> | Mod_cont_NL | BA decline + BA decline <sup>2</sup> | 5 | -300.810  | 612.734  | 0.000   | 0.971 | 0.005 | No |
|                                              | Mod_cont    | BA decline                           | 4 | -305.580  | 619.878  | 7.143   | 0.027 | 0.005 |    |
|                                              | Modnull1    | Null model                           | 3 | -309.380  | 625.194  | 12.460  | 0.002 | 0.000 |    |
| <b>Cervus dung proportional</b>              | Mod_cont_NL | BA decline + BA decline <sup>2</sup> | 4 | -2758.300 | 5525.300 | 0.000   | 1.000 | 0.029 | No |
|                                              | Mod_cont    | BA decline                           | 3 | -2780.300 | 5567.070 | 41.766  | 0.000 | 0.001 |    |
|                                              | Modnull1    | Null model                           | 2 | -2871.200 | 5746.540 | 221.241 | 0.000 | 0.000 |    |
| <b>Equus dung proportional</b>               | Mod_cont    | BA decline                           | 3 | -627.110  | 1260.650 | 0.000   | 0.759 | 0.173 | No |
|                                              | Mod_cont_NL | BA decline + BA decline <sup>2</sup> | 4 | -627.110  | 1262.950 | 2.298   | 0.241 | 0.175 |    |
|                                              | Modnull1    | Null model                           | 2 | -729.680  | 1463.570 | 202.920 | 0.000 | 0.000 |    |
| <b>Proportional dung total</b>               | Mod_cont_NL | BA decline + BA decline <sup>2</sup> | 4 | -2636.600 | 5281.920 | 0.000   | 1.000 | 0.016 | No |
|                                              | Mod_cont    | BA decline                           | 3 | -2647.100 | 5300.560 | 18.636  | 0.000 | 0.004 |    |
|                                              | Modnull1    | Null model                           | 2 | -2674.300 | 5352.800 | 70.880  | 0.000 | 0.000 |    |
| <b>Very large beech</b>                      | Mod_cont    | BA decline                           | 3 | -61.549   | 129.643  | 0.000   | 0.586 | 0.104 | No |

|                                                            |             |                                      |   |          |         |         |       |       |     |
|------------------------------------------------------------|-------------|--------------------------------------|---|----------|---------|---------|-------|-------|-----|
| <b>trees (74.97 cm &lt; dbh &lt; 103 cm)</b>               | Modnull1    | Null model                           | 2 | -63.607  | 131.480 | 1.836   | 0.234 | 0.000 |     |
|                                                            | Mod_cont_NL | BA decline + BA decline <sup>2</sup> | 4 | -61.535  | 132.000 | 2.356   | 0.180 | 0.101 |     |
| <b>Large beech trees (68.32 cm &lt; dbh &lt; 74.97 cm)</b> | Mod_cont    | BA decline                           | 3 | -59.977  | 126.499 | 0.000   | 0.744 | 0.294 | No  |
|                                                            | Mod_cont_NL | BA decline + BA decline <sup>2</sup> | 4 | -59.857  | 128.644 | 2.145   | 0.255 | 0.322 |     |
|                                                            | Modnull1    | Null model                           | 2 | -67.724  | 139.714 | 13.216  | 0.001 | 0.000 |     |
| <b>Holly tree abundance</b>                                | Mod_cont    | BA decline                           | 3 | -118.510 | 243.555 | 0.000   | 0.454 | 0.015 | No  |
|                                                            | Mod_cont_NL | BA decline + BA decline <sup>2</sup> | 4 | -117.800 | 244.532 | 0.978   | 0.279 | 0.019 |     |
|                                                            | Modnull1    | Null model                           | 2 | -120.170 | 244.615 | 1.060   | 0.267 | 0.000 |     |
| <b>Beech trees abundance</b>                               | Mod_cont_NL | BA decline + BA decline <sup>2</sup> | 4 | -101.000 | 210.719 | 0.000   | 1.000 | 0.778 | Yes |
|                                                            | Mod_cont    | BA decline                           | 3 | -111.490 | 229.400 | 18.682  | 0.000 | 0.639 |     |
|                                                            | Modnull1    | Null model                           | 2 | -171.050 | 346.306 | 135.587 | 0.000 | 0.000 |     |
| <b>Holly saplings abundance</b>                            | Mod_cont_NL | BA decline + BA decline <sup>2</sup> | 4 | -354.540 | 717.797 | 0.000   | 0.988 | 0.005 | No  |
|                                                            | Mod_cont    | BA decline                           | 3 | -360.280 | 726.991 | 9.195   | 0.010 | 0.000 |     |
|                                                            | Modnull1    | Null model                           | 2 | -363.170 | 730.549 | 12.752  | 0.002 | 0.000 |     |
| <b>Beech saplings abundance</b>                            | Mod_cont_NL | BA decline + BA decline <sup>2</sup> | 4 | -35.653  | 80.033  | 0.000   | 0.997 | 0.075 | No  |
|                                                            | Mod_cont    | BA decline                           | 3 | -42.921  | 92.270  | 12.236  | 0.002 | 0.008 |     |
|                                                            | Modnull1    | Null model                           | 2 | -44.862  | 93.935  | 13.902  | 0.001 | 0.000 |     |

|                                                |              |                                                  |   |          |         |         |       |       |     |
|------------------------------------------------|--------------|--------------------------------------------------|---|----------|---------|---------|-------|-------|-----|
| <b>Overall saplings abundance</b>              | Mod_cont_NL  | BA decline + BA decline <sup>2</sup>             | 4 | -369.570 | 747.876 | 0.000   | 0.950 | 0.006 | No  |
|                                                | Mod_cont     | BA decline                                       | 3 | -373.970 | 754.369 | 6.493   | 0.037 | 0.000 |     |
|                                                | Modnull1     | Null model                                       | 2 | -376.150 | 756.504 | 8.628   | 0.013 | 0.000 |     |
| <b>Ground flora species richness</b>           | Mod_cont_NL  | BA decline + BA decline <sup>2</sup> + log(Dung) | 5 | -183.090 | 377.285 | 0.000   | 0.898 | 0.596 | Yes |
|                                                | Mod_cont     | BA decline + log(Dung)                           | 4 | -186.960 | 382.653 | 5.368   | 0.061 | 0.548 |     |
|                                                | Mod_cont_NL2 | BA decline + BA decline <sup>2</sup>             | 4 | -187.400 | 383.531 | 6.246   | 0.040 | 0.549 |     |
|                                                | Mod_cont2    | BA decline                                       | 3 | -192.550 | 391.533 | 14.249  | 0.001 | 0.486 |     |
|                                                | Modnull1     | Null model                                       | 3 | -257.450 | 521.336 | 144.052 | 0.000 | 0.028 |     |
| <b>Woody ground flora species richness</b>     | Mod_cont2    | BA decline                                       | 3 | -112.510 | 231.446 | 0.000   | 0.494 | 0.052 | No  |
|                                                | Mod_cont     | BA decline + log(Dung)                           | 4 | -112.400 | 233.532 | 2.087   | 0.174 | 0.055 |     |
|                                                | Mod_cont_NL2 | BA decline + BA decline <sup>2</sup>             | 4 | -112.500 | 233.731 | 2.285   | 0.158 | 0.053 |     |
|                                                | Modnull1     | Null model                                       | 3 | -113.920 | 234.265 | 2.819   | 0.121 | 0.001 |     |
|                                                | Mod_cont_NL  | BA decline + BA decline <sup>2</sup> + log(Dung) | 5 | -112.400 | 235.912 | 4.467   | 0.053 | 0.056 |     |
| <b>Non-woody ground flora species richness</b> | Mod_cont_NL  | BA decline + BA decline <sup>2</sup> + log(Dung) | 5 | -172.810 | 356.738 | 0.000   | 0.956 | 0.655 | Yes |

|                                         |              |                                                              |   |          |         |         |       |       |     |
|-----------------------------------------|--------------|--------------------------------------------------------------|---|----------|---------|---------|-------|-------|-----|
|                                         | Mod_cont_NL2 | BA decline<br>+ BA decline <sup>2</sup>                      | 4 | -177.130 | 362.980 | 6.242   | 0.042 | 0.610 |     |
|                                         | Mod_cont     | BA decline<br>+ log(Dung)                                    | 4 | -180.150 | 369.033 | 12.295  | 0.002 | 0.582 |     |
|                                         | Mod_cont2    | BA decline                                                   | 3 | -186.090 | 378.598 | 21.860  | 0.000 | 0.517 |     |
|                                         | Modnull1     | Null model                                                   | 3 | -262.040 | 530.507 | 173.769 | 0.000 | 0.032 |     |
| <b>Lichen species richness</b>          | Mod_cont_NL  | BA decline<br>+ BA decline <sup>2</sup><br>+ Holly abundance | 5 | -221.100 | 453.317 | 0.000   | 1.000 | 0.437 |     |
|                                         | Mod_cont     | BA decline<br>+ Holly abundance                              | 4 | -231.850 | 472.417 | 19.100  | 0.000 | 0.331 | Yes |
|                                         | Modnull1     | Null model                                                   | 3 | -250.110 | 506.652 | 53.335  | 0.000 | 0.140 |     |
| <b>Lichen species richness on holly</b> | Modnull1     | Null model                                                   | 2 | -224.964 | 454.138 | 0.000   | 0.498 | 0.000 |     |
|                                         | Mod_cont     | BA decline                                                   | 3 | -224.168 | 454.764 | 0.626   | 0.364 | 0.001 | No  |
|                                         | Mod_cont_NL  | BA decline<br>+ BA decline <sup>2</sup>                      | 4 | -223.993 | 456.712 | 2.574   | 0.138 | 0.004 |     |
| <b>Lichen species richness on beech</b> | Mod_cont_NL  | BA decline<br>+ BA decline <sup>2</sup>                      | 4 | -208.980 | 426.688 | 0.000   | 1.000 | 0.599 |     |
|                                         | Mod_cont     | BA decline                                                   | 3 | -238.790 | 484.014 | 57.326  | 0.000 | 0.392 | Yes |
|                                         | Modnull1     | Null model                                                   | 2 | -289.570 | 583.340 | 156.652 | 0.000 | 0.000 |     |
| <b>Organic layer loss on ignition</b>   | Modnull1     | Null model                                                   | 3 | -47.462  | 101.352 | 0.000   | 0.735 | 0.000 |     |
|                                         | Mod_cont     | BA decline                                                   | 4 | -47.661  | 104.049 | 2.697   | 0.191 | 0.008 | No  |
|                                         | Mod_cont_NL  | BA decline<br>+ BA decline <sup>2</sup>                      | 5 | -47.408  | 105.927 | 4.575   | 0.075 | 0.008 |     |

|                                                                |             |                                      |   |          |         |        |       |       |    |
|----------------------------------------------------------------|-------------|--------------------------------------|---|----------|---------|--------|-------|-------|----|
| <b>Mineral layer loss on ignition</b>                          | Modnull1    | Null model                           | 3 | -63.385  | 133.199 | 0.000  | 0.520 | 0.000 | No |
|                                                                | Mod_cont    | BA decline                           | 4 | -62.741  | 134.209 | 1.010  | 0.314 | 0.020 |    |
|                                                                | Mod_cont_NL | BA decline + BA decline <sup>2</sup> | 5 | -62.180  | 135.470 | 2.271  | 0.167 | 0.020 |    |
| <b>Organic layer nitrate concentration</b>                     | Modnull1    | Null model                           | 3 | -63.091  | 132.611 | 0.000  | 0.399 | 0.000 | No |
|                                                                | Mod_cont_NL | BA decline + BA decline <sup>2</sup> | 5 | -60.917  | 132.946 | 0.335  | 0.338 | 0.054 |    |
|                                                                | Mod_cont    | BA decline                           | 4 | -62.359  | 133.446 | 0.835  | 0.263 | 0.034 |    |
| <b>Mineral layer nitrate concentration</b>                     | Modnull1    | Null model                           | 3 | -63.091  | 132.611 | 0.000  | 0.399 | 0.000 | No |
|                                                                | Mod_cont_NL | BA decline + BA decline <sup>2</sup> | 5 | -60.917  | 132.946 | 0.335  | 0.338 | 0.054 |    |
|                                                                | Mod_cont    | BA decline                           | 4 | -62.359  | 133.446 | 0.835  | 0.263 | 0.034 |    |
| <b>Organic layer ammonium concentration</b>                    | Mod_cont_NL | BA decline + BA decline <sup>2</sup> | 5 | -235.070 | 481.246 | 0.000  | 0.959 | 0.052 | No |
|                                                                | Mod_cont    | BA decline                           | 4 | -239.470 | 487.665 | 6.419  | 0.039 | 0.036 |    |
|                                                                | Modnull1    | Null model                           | 3 | -243.470 | 493.374 | 12.128 | 0.002 | 0.000 |    |
| <b>Mineral layer ammonium concentration</b>                    | Modnull1    | Null model                           | 3 | -43.781  | 93.990  | 0.000  | 0.776 | 0.000 | No |
|                                                                | Mod_cont    | BA decline                           | 4 | -44.375  | 97.477  | 3.487  | 0.136 | 0.003 |    |
|                                                                | Mod_cont_NL | BA decline + BA decline <sup>2</sup> | 5 | -43.620  | 98.351  | 4.361  | 0.088 | 0.006 |    |
| <b>Potentially mineralisable nitrogen of the organic layer</b> | Modnull1    | Null model                           | 3 | -122.240 | 250.909 | 0.000  | 0.461 | 0.000 | No |
|                                                                | Mod_cont_NL | BA decline + BA decline <sup>2</sup> | 5 | -120.250 | 251.611 | 0.702  | 0.325 | 0.001 |    |
|                                                                | Mod_cont    | BA decline                           | 4 | -121.860 | 252.438 | 1.529  | 0.215 | 0.001 |    |

|                                                                |             |                                                            |   |          |         |        |       |       |     |
|----------------------------------------------------------------|-------------|------------------------------------------------------------|---|----------|---------|--------|-------|-------|-----|
| <b>Potentially mineralisable nitrogen of the mineral layer</b> | Mod_cont_NL | BA decline<br>+ BA decline <sup>2</sup><br>+ soil moisture | 6 | -186.840 | 387.270 | 0.000  | 0.974 | 0.129 | No  |
|                                                                | Mod_cont    | BA decline<br>+ soil moisture                              | 5 | -191.740 | 394.586 | 7.317  | 0.025 | 0.091 |     |
|                                                                | Modnull1    | Null model                                                 | 4 | -196.920 | 402.558 | 15.289 | 0.000 | 0.014 |     |
| <b>Understorey biomass</b>                                     | Mod_cont_NL | BA decline<br>+ BA decline <sup>2</sup>                    | 6 | -137.210 | 288.010 | 0.000  | 0.905 | 0.380 | Yes |
|                                                                | Mod_cont    | BA decline                                                 | 5 | -141.355 | 293.820 | 5.810  | 0.050 | 0.342 |     |
|                                                                | Modnull1    | Null model                                                 | 4 | -142.626 | 293.980 | 5.970  | 0.046 | 0.335 |     |



295 Table S4: Updated version of Table S3 with only linear and quadratic term of BA included as fixed effects.

| Response variable                   | Name        | Model structure                      | df | Log likelihood | AICc     | $\Delta$ AICc | AICc weight | Marginal $r^2$ | Threshold? |
|-------------------------------------|-------------|--------------------------------------|----|----------------|----------|---------------|-------------|----------------|------------|
| <b>Abundance of holly seedlings</b> | Mod_cont_NL | BA decline + BA decline <sup>2</sup> | 4  | -1364.378      | 2737.483 | 0.000         | 1.000       | 0.116          | No         |
|                                     | Mod_cont    | BA decline                           | 3  | -1849.403      | 3705.234 | 967.751       | 0.000       | 0.033          |            |
|                                     | Modnull1    | Null model                           | 2  | -1895.355      | 3794.921 | 1057.438      | 0.000       | 0.000          |            |
| <b>Abundance of beech seedlings</b> | Mod_cont_NL | BA decline + BA decline <sup>2</sup> | 4  | -279.394       | 567.515  | 0.000         | 1.000       | 0.217          | Yes        |
|                                     | Mod_cont    | BA decline                           | 3  | -302.158       | 610.744  | 43.229        | 0.000       | 0.170          |            |
|                                     | Modnull1    | Null model                           | 2  | -331.657       | 667.524  | 100.009       | 0.000       | 0.000          |            |
| <b>Abundance of oak seedlings</b>   | Mod_cont_NL | BA decline+ BA decline <sup>2</sup>  | 4  | -50.284        | 109.295  | 0.000         | 0.999       | 0.444          | Yes        |
|                                     | Mod_cont    | BA decline                           | 3  | -58.639        | 123.706  | 14.412        | 0.001       | 0.147          |            |
|                                     | Modnull1    | Null model                           | 2  | -65.866        | 135.942  | 26.648        | 0.000       | 0.000          |            |
| <b>Abundance of tree seedlings</b>  | Mod_cont_NL | BA decline+ BA decline <sup>2</sup>  | 4  | -1403.461      | 2815.650 | 0.000         | 1.000       | 0.134          | No         |
|                                     | Mod_cont    | BA decline                           | 3  | -1907.548      | 3821.524 | 1005.874      | 0.000       | 0.046          |            |
|                                     | Modnull1    | Null model                           | 2  | -1970.624      | 3945.459 | 1129.809      | 0.000       | 0.000          |            |
| <b>Abundance of palatable</b>       | Mod_cont_NL | BA decline + BA decline <sup>2</sup> | 4  | -267.337       | 543.401  | 0.000         | 1.000       | 0.293          | Yes        |

|                                                                               |             |                                         |   |          |          |         |       |       |    |
|-------------------------------------------------------------------------------|-------------|-----------------------------------------|---|----------|----------|---------|-------|-------|----|
| <b>seedlings</b>                                                              | Mod_cont    | BA decline                              | 3 | -296.268 | 598.964  | 55.564  | 0.000 | 0.224 |    |
|                                                                               | Modnull1    | Null model                              | 2 | -332.499 | 669.209  | 125.808 | 0.000 | 0.000 |    |
|                                                                               | Mod_cont    | BA decline                              | 4 | -75.534  | 159.796  | 0.388   | 0.452 | 0.443 |    |
|                                                                               | Modnull1    | Null model                              | 3 | -93.483  | 193.394  | 33.987  | 0.000 | 0.000 |    |
| <b>C/N ratio of the soil</b>                                                  | Mod_cont_NL | BA decline<br>+ BA decline <sup>2</sup> | 5 | -154.329 | 319.770  | 0.000   | 0.775 | 0.060 | No |
|                                                                               | Mod_cont    | BA decline                              | 4 | -156.799 | 322.325  | 2.555   | 0.216 | 0.056 |    |
|                                                                               | Modnull1    | Null model                              | 3 | -161.109 | 328.647  | 8.877   | 0.009 | 0.000 |    |
| <b>Potassium exchangeable cations concentration in the mineral layer soil</b> | Modnull1    | Null model                              | 3 | 76.590   | -146.751 | 0.000   | 0.513 | 0.000 | No |
|                                                                               | Mod_cont    | BA decline                              | 4 | 77.626   | -146.525 | 0.225   | 0.458 | 0.099 |    |
|                                                                               | Mod_cont_NL | BA decline<br>+ BA decline              | 5 | 76.035   | -140.960 | 5.791   | 0.028 | 0.102 |    |
| <b>Magnesium exchangeable cations concentration in the mineral layer soil</b> | Mod_cont_NL | BA decline<br>+ BA decline <sup>2</sup> | 5 | -109.120 | 229.352  | 0.000   | 0.380 | 0.018 | No |
|                                                                               | Mod_cont    | BA decline                              | 3 | -111.601 | 229.631  | 0.279   | 0.330 | 0.000 |    |
|                                                                               | Modnull1    | Null model                              | 4 | -110.582 | 229.891  | 0.539   | 0.290 | 0.018 |    |
| <b>Sodium exchangeable cations</b>                                            | Mod_cont    | BA decline                              | 4 | 112.188  | -215.649 | 0.000   | 0.971 | 0.339 | No |

|                                                                               |             |                                      |   |          |          |         |       |       |    |
|-------------------------------------------------------------------------------|-------------|--------------------------------------|---|----------|----------|---------|-------|-------|----|
| <b>concentration in the mineral layer soil</b>                                | Mod_cont_NL | BA decline + BA decline <sup>2</sup> | 5 | 109.859  | -208.606 | 7.043   | 0.029 | 0.336 |    |
|                                                                               | Modnull1    | Null model                           | 3 | 102.076  | -197.722 | 17.926  | 0.000 | 0.000 |    |
| <b>Calcium exchangeable cations concentration in the mineral layer soil</b>   | Mod_cont_NL | BA decline + BA decline <sup>2</sup> | 5 | 15.602   | -20.092  | 0.000   | 0.805 | 0.141 | No |
|                                                                               | Modnull1    | Null model                           | 3 | 11.842   | -17.256  | 2.836   | 0.195 | 0.000 |    |
|                                                                               | Mod_cont    | BA decline                           | 4 | -123.252 | 255.303  | 275.395 | 0.000 | 0.056 |    |
| <b>Manganese exchangeable cations concentration in the mineral layer soil</b> | Modnull1    | Null model                           | 3 | 88.883   | -171.338 | 0.000   | 0.983 | 0.000 | No |
|                                                                               | Mod_cont    | BA decline                           | 4 | 85.913   | -163.100 | 8.238   | 0.016 | 0.003 |    |
|                                                                               | Mod_cont_NL | BA decline + BA decline <sup>2</sup> | 5 | 84.722   | -158.333 | 13.005  | 0.001 | 0.024 |    |
| <b>Iron exchangeable cations concentration in the mineral layer soil</b>      | Mod_cont_NL | BA decline + BA decline              | 5 | -268.341 | 547.793  | 0.000   | 0.974 | 0.085 | No |
|                                                                               | Mod_cont    | BA decline                           | 4 | -273.180 | 555.087  | 7.294   | 0.025 | 0.072 |    |
|                                                                               | Modnull1    | Null model                           | 3 | -279.186 | 564.801  | 17.008  | 0.000 | 0.000 |    |
| <b>Aluminium exchangeable cations concentration in the mineral layer soil</b> | Modnull1    | Null model                           | 3 | -38.524  | 83.476   | 0.000   | 0.511 | 0.000 | No |
|                                                                               | Mod_cont    | BA decline                           | 4 | -37.721  | 84.169   | 0.693   | 0.362 | 0.031 |    |
|                                                                               | Mod_cont_NL | BA decline + BA decline <sup>2</sup> | 5 | -37.576  | 86.262   | 2.786   | 0.127 | 0.031 |    |
| <b>Availability of soil phosphorus</b>                                        | Modnull1    | Null model                           | 3 | 72.697   | -138.966 | 0.000   | 0.982 | 0.000 | No |

|                                            |             |                                         |   |          |          |         |       |       |     |
|--------------------------------------------|-------------|-----------------------------------------|---|----------|----------|---------|-------|-------|-----|
|                                            | Mod_cont    | BA decline                              | 4 | 69.793   | -130.859 | 8.108   | 0.017 | 0.000 |     |
|                                            | Mod_cont_NL | BA decline<br>+ BA decline <sup>2</sup> | 5 | 68.117   | -125.122 | 13.844  | 0.001 | 0.000 |     |
| <b>Total soil nitrogen</b>                 | Modnull1    | Null model                              | 3 | -61.364  | 129.156  | 0.000   | 0.773 | 0.000 | No  |
|                                            | Mod_cont    | BA decline                              | 4 | -61.891  | 132.510  | 3.354   | 0.144 | 0.002 |     |
|                                            | Mod_cont_NL | BA decline<br>+ BA decline <sup>2</sup> | 5 | -61.260  | 133.631  | 4.475   | 0.083 | 0.003 |     |
| <b>Total soil carbon</b>                   | Mod_cont_NL | BA decline<br>+ BA decline <sup>2</sup> | 5 | -230.653 | 472.418  | 0.000   | 0.943 | 0.077 | No  |
|                                            | Mod_cont    | BA decline                              | 4 | -234.674 | 478.076  | 5.658   | 0.056 | 0.069 |     |
|                                            | Modnull1    | Null model                              | 3 | -240.080 | 486.589  | 14.171  | 0.001 | 0.000 |     |
| <b>Net mineralisation</b>                  | Mod_cont_NL | BA decline<br>+ BA decline <sup>2</sup> | 5 | -120.972 | 253.168  | 0.000   | 0.706 | 0.065 | No  |
|                                            | Mod_cont    | BA decline                              | 4 | -123.252 | 255.303  | 2.135   | 0.243 | 0.056 |     |
|                                            | Modnull1    | Null model                              | 5 | -125.972 | 258.414  | 5.246   | 0.051 | 0.000 |     |
| <b>Ground flora species richness</b>       | Mod_cont_NL | BA decline<br>+ BA decline <sup>2</sup> | 4 | -187.402 | 383.531  | 0.000   | 0.982 | 0.549 | Yes |
|                                            | Mod_cont    | BA decline                              | 3 | -192.552 | 391.533  | 8.002   | 0.018 | 0.486 |     |
|                                            | Modnull1    | Null model                              | 3 | -257.751 | 519.712  | 136.181 | 0.000 | 0.000 |     |
| <b>Woody ground flora species richness</b> | Mod_cont    | BA decline                              | 3 | -112.508 | 231.446  | 0.000   | 0.491 | 0.052 | No  |
|                                            | Modnull1    | Null model                              | 2 | -113.948 | 232.107  | 0.662   | 0.353 | 0.000 |     |

|                                                                            |             |                                         |   |          |         |         |       |       |     |
|----------------------------------------------------------------------------|-------------|-----------------------------------------|---|----------|---------|---------|-------|-------|-----|
|                                                                            | Mod_cont_NL | BA decline<br>+ BA decline <sup>2</sup> | 4 | -112.502 | 233.731 | 2.285   | 0.157 | 0.053 |     |
| <b>Non-woody<br/>ground flora<br/>species richness</b>                     | Mod_cont_NL | BA decline<br>+ BA decline <sup>2</sup> | 4 | -177.126 | 362.979 | 0.000   | 1.000 | 0.610 | Yes |
|                                                                            | Mod_cont    | BA decline<br>+ BA decline <sup>2</sup> | 3 | -186.085 | 378.598 | 15.618  | 0.000 | 0.517 |     |
|                                                                            | Modnull1    | BA decline                              | 2 | -262.197 | 528.604 | 165.624 | 0.000 | 0.000 |     |
| <b>Lichen species<br/>richness</b>                                         | Mod_cont_NL | BA decline<br>+ BA decline <sup>2</sup> | 4 | -243.059 | 494.845 | 0.000   | 0.998 | 0.240 | Yes |
|                                                                            | Mod_cont    | BA decline                              | 3 | -250.311 | 507.050 | 12.205  | 0.002 | 0.169 |     |
|                                                                            | Modnull1    | Null model                              | 2 | -265.919 | 536.048 | 41.203  | 0.000 | 0.000 |     |
| <b>Potentially<br/>mineralisable<br/>nitrogen of the<br/>mineral layer</b> | Mod_cont_NL | BA decline<br>+ BA decline <sup>2</sup> | 5 | -185.964 | 383.038 | 0.000   | 0.982 | 0.114 | No  |
|                                                                            | Mod_cont    | BA decline                              | 4 | -191.192 | 391.112 | 8.074   | 0.017 | 0.068 |     |
|                                                                            | Modnull1    | Null model                              | 3 | -195.963 | 398.355 | 15.317  | 0.000 | 0.000 |     |

296

297

298

299 *Table S5: Statistics of the soil properties. Mean, standard deviation (SD), standard error (SE), and confidence interval (CI) of several soil*  
 300 *properties across the stages of dieback.*

|                                  | <b>Percent basal area decline</b> | N  | Mean   | SD    | SE    | CI    |
|----------------------------------|-----------------------------------|----|--------|-------|-------|-------|
| Clay (%)                         | 0%                                | 12 | 20.42  | 3.68  | 1.06  | 2.34  |
|                                  | 25%                               | 12 | 20.00  | 4.75  | 1.37  | 3.02  |
|                                  | 50%                               | 12 | 21.08  | 7.29  | 2.11  | 4.63  |
|                                  | 75%                               | 12 | 19.08  | 6.24  | 1.80  | 3.97  |
|                                  | 100%                              | 12 | 20.58  | 7.90  | 2.28  | 5.02  |
| Sand (%)                         | 0%                                | 12 | 48.83  | 6.79  | 1.96  | 4.32  |
|                                  | 25%                               | 12 | 49.50  | 6.47  | 1.87  | 4.11  |
|                                  | 50%                               | 12 | 49.50  | 10.12 | 2.92  | 6.43  |
|                                  | 75%                               | 12 | 52.50  | 10.98 | 3.17  | 6.97  |
|                                  | 100%                              | 12 | 51.08  | 10.40 | 3.00  | 6.61  |
| Silt (%)                         | 0%                                | 12 | 30.75  | 4.81  | 1.39  | 3.05  |
|                                  | 25%                               | 12 | 30.50  | 4.52  | 1.31  | 2.87  |
|                                  | 50%                               | 12 | 29.42  | 4.87  | 1.41  | 3.09  |
|                                  | 75%                               | 12 | 28.42  | 5.68  | 1.64  | 3.61  |
|                                  | 100%                              | 12 | 28.33  | 4.21  | 1.21  | 2.67  |
| pH                               | 0%                                | 12 | 4.19   | 0.28  | 0.08  | 0.18  |
|                                  | 25%                               | 12 | 4.40   | 0.38  | 0.11  | 0.24  |
|                                  | 50%                               | 12 | 4.37   | 0.28  | 0.08  | 0.18  |
|                                  | 75%                               | 12 | 4.27   | 0.27  | 0.08  | 0.17  |
|                                  | 100%                              | 12 | 4.27   | 0.35  | 0.10  | 0.23  |
| Moisture content (Organic layer) | 0%                                | 12 | 157.07 | 41.05 | 11.85 | 26.08 |
|                                  | 25%                               | 12 | 163.33 | 50.04 | 14.45 | 31.80 |
|                                  | 50%                               | 12 | 149.21 | 53.35 | 15.40 | 33.89 |

|                                     |      |    |        |       |       |       |
|-------------------------------------|------|----|--------|-------|-------|-------|
|                                     | 75%  | 12 | 153.40 | 53.37 | 15.41 | 33.91 |
|                                     | 100% | 12 | 149.42 | 67.39 | 19.45 | 42.82 |
| Moisture content<br>(Mineral layer) | 0%   | 12 | 27.94  | 4.85  | 1.40  | 3.08  |
|                                     | 25%  | 12 | 34.58  | 16.45 | 4.75  | 10.45 |
|                                     | 50%  | 12 | 29.00  | 4.76  | 1.37  | 3.02  |
|                                     | 75%  | 12 | 27.68  | 6.67  | 1.93  | 4.24  |
|                                     | 100% | 12 | 27.81  | 5.57  | 1.61  | 3.54  |

301

302

303 Supplementary Methods: SM3. Graphs to support the space-for-time  
304 assumption  
305

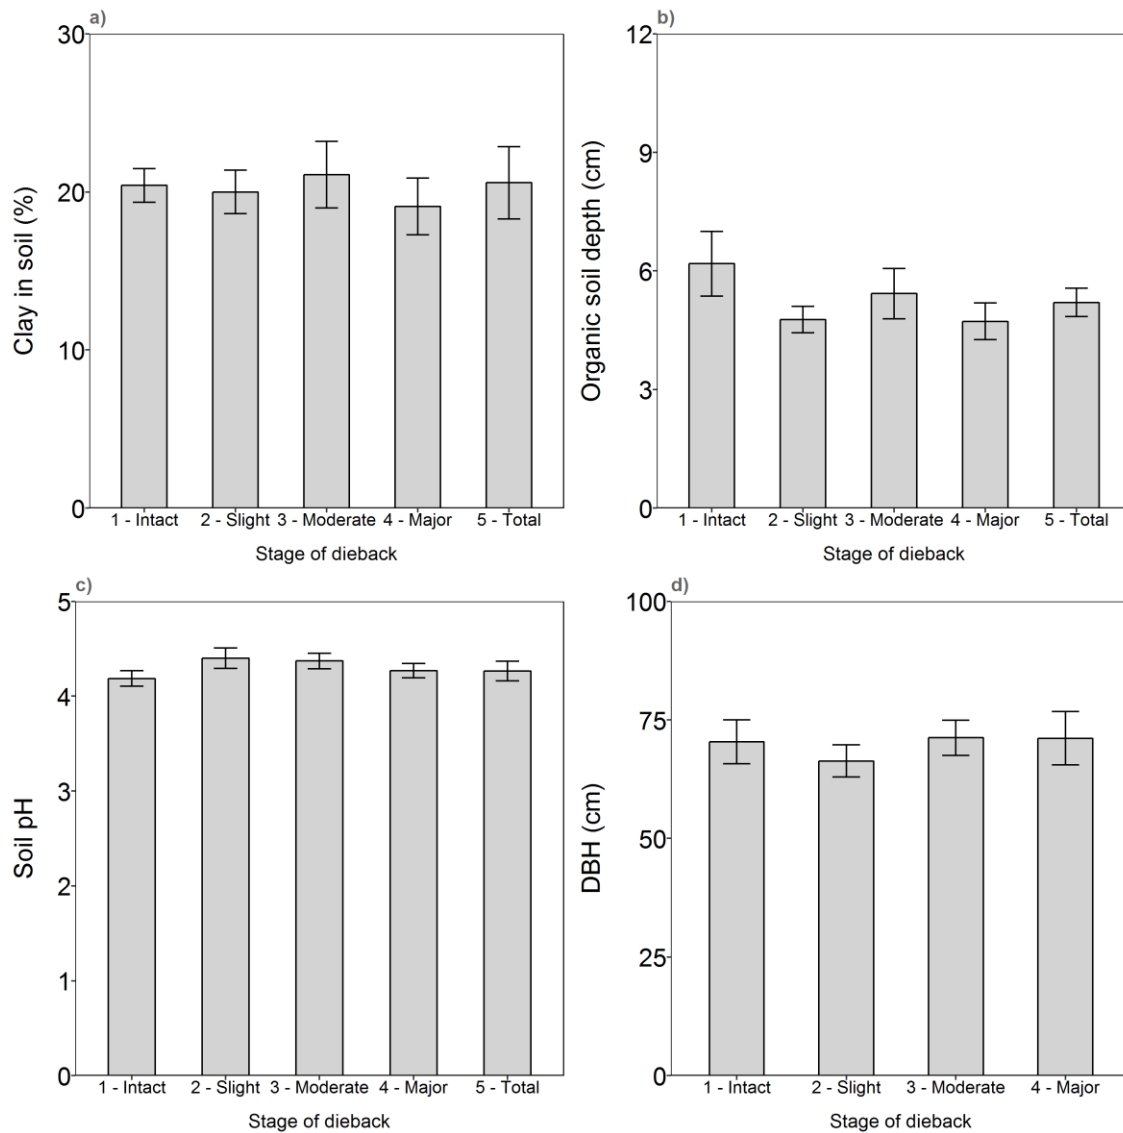

306  
307 *Fig S3: Mean values (n = 12) of a) clay soil content; b) depth of the organic soil layer; c) pH of the soil across*  
308 *the gradient of dieback; and d) diameter at breast height (DBH) of the living beech trees across the gradient*  
309 *of dieback. The black bars indicate the standard error of the mean.*

310  
311  
312



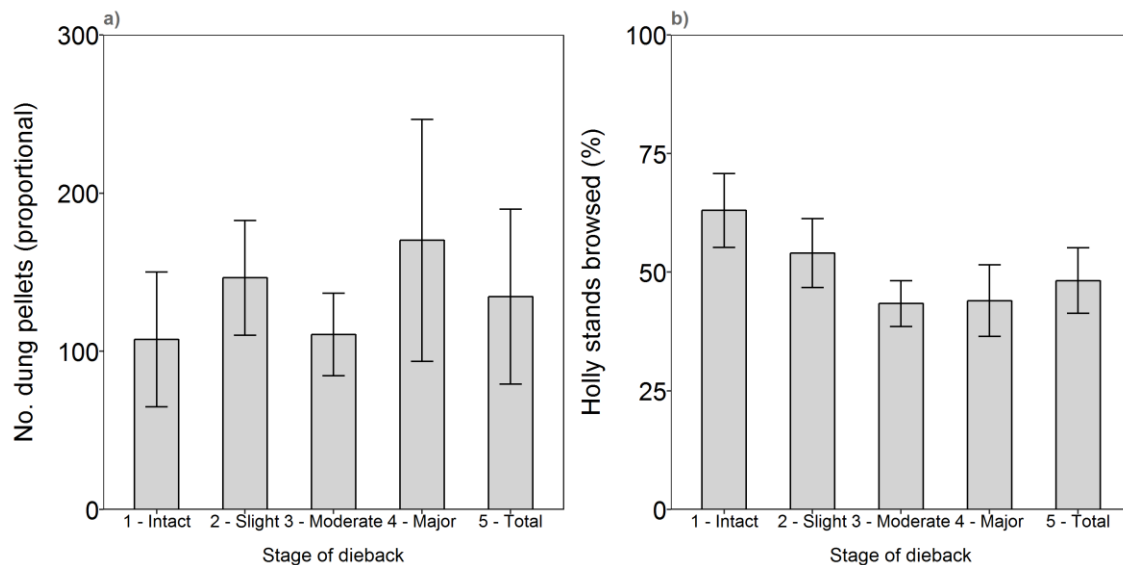

313

314 *Fig S4: Mean values of a) the total herbivore dung count, and b) percentage of holly shoots browsed by*  
 315 *herbivores across the gradient of dieback. The black bars indicate the standard error of the mean.*

316

### 317 Supplementary references

- 318 1. Husch, B., Beers, T. W. & Kershaw, J. A. *Forest mensuration* (Wiley, 2003).
- 319 2. van Laar, A. & Akça, A. *Forest mensuration* (Springer, 2007).
- 320 3. Cantarello, E. & Newton, A. C. Identifying cost-effective indicators to assess the  
 321 conservation status of forested habitats in Natura 2000 sites. *For. Ecol. Manage.* **256**,  
 322 815-826, doi:10.1016/j.foreco.2008.05.031 (2008).
- 323 4. Strickler, G. S. Use of the densiometer to estimate density of forest canopy on  
 324 permanent sample plots (USDA Forest Service, 1959).
- 325 5. Jenkins, T. A. R. *et al.* FC woodland carbon code: Carbon assessment protocol  
 326 (Forestry Commission, 2011).
- 327 6. McKay, H., Hudson, J. B. & Hudson, R. J. Woodfuel resource in Britain: Appendices.  
 328 Fes b/w3/00787/rep/2. Dti/pub urn 03/1436 (Forestry Contracting Association, 2003).
- 329 7. Matthews, G. A. R. The carbon content of trees. Forestry commission technical paper  
 330 4 (Forestry Commission, 1993).
- 331 8. Stewart, K. E. J., Bourn, N. A. D. & Thomas, J. A. An evaluation of three quick  
 332 methods commonly used to assess sward height in ecology. *J. Appl. Ecol.* **38**, 1148-  
 333 1154, doi:10.1046/j.1365-2664.2001.00658.x (2001).
- 334 9. Bergström, R. & Guillet, C. Summer browsing by large herbivores in short-rotation  
 335 willow plantations. *Biomass Bioenergy* **23**, 27-32, doi:10.1016/S0961-  
 336 9534(02)00027-2 (2002).
- 337 10. Gibson, D. J. *Methods in comparative plant population ecology* (Oxford University  
 338 Press, 2002).
- 339 11. Bazely, D. R., Myers, J. H. & da Silva, K. B. The response of numbers of bramble  
 340 prickles to herbivory and depressed resource availability. *Oikos* **61**, 327-336,  
 341 doi:10.2307/3545240 (1991).
- 342 12. Campbell, D., Swanson, G. M. & Sales, J. Methodological insights: Comparing the  
 343 precision and cost-effectiveness of faecal pellet group count methods. *J. Appl. Ecol.*  
 344 **41**, 1185-1196, doi:10.1111/j.0021-8901.2004.00964.x (2004).

- 345 13. Marques, F. F. C. *et al.* Estimating deer abundance from line transect surveys of dung:  
346 Sika deer in southern Scotland. *J. Appl. Ecol.***38**, 349-363, doi:10.1046/j.1365-  
347 2664.2001.00584.x (2001).
- 348 14. Jenkins, K. J. & Manly, B. A double-observer method for reducing bias in faecal  
349 pellet surveys of forest ungulates. *J. Appl. Ecol.***45**, 1339-1348, doi:10.1111/j.1365-  
350 2664.2008.01512.x (2008).
- 351 15. DeLuca, T., Zewdie, S., Zackrisson, O., Healey, J. & Jones, D. Bracken fern  
352 (*Pteridium aquilinum* L. Kuhn) promotes an open nitrogen cycle in heathland soils.  
353 *Plant Soil* **367**, 521-534, doi:10.1007/s11104-012-1484-0 (2013).
- 354 16. Mulvaney, R. S. Nitrogen - inorganic forms in *Methods of soil analysis. Part 3 -*  
355 *chemical methods* (ed. Sparks, D. L.) 1123–1184 (Soil Science Society of America,  
356 1996).
- 357 17. Miranda, K. M., Espey, M. G. & Wink, D. A. A rapid, simple spectrophotometric  
358 method for simultaneous detection of nitrate and nitrite. *Nitric Oxide* **5**, 62-71,  
359 doi:10.1006/niox.2000.0319 (2001).
- 360 18. Keeney, D. R. in *Methods of soil analysis: Chemical and microbiological properties*  
361 (eds. Page, A. L., Miller, R. H. & Keeney, D. R.) (Soil Society of America, 1982).
- 362 19. PP Systems. EGM-4 Environmental Gas Monitor for CO<sub>2</sub>: Operator's manual version  
363 4.18 (PP Systems, 2010).
- 364 20. Rowell, D. L. *Soil science: Methods & application* (John Wiley & Sons, Ltd, 1994).
- 365 21. Dytham, C. *Choosing and using statistics: A biologist's guide* (John Wiley & Sons,  
366 2011).
- 367 22. Warton, D. I. & Hui, F. K. C. The arcsine is asinine: The analysis of proportions in  
368 ecology. *Ecology* **92**, 3-10, doi:10.1890/10-0340.1 (2010).
- 369 23. Burnham, K. P. & Anderson, D. R. *Model selection and multimodel inference*  
370 (Springer-Verlag, 2002).
- 371 24. Barton, K. Mumin: Multi-model inference: R package version 1.10.0. (2014).
- 372 25. Nakagawa, S. & Schielzeth, H. A general and simple method for obtaining  $R^2$  from  
373 generalized linear mixed-effects models. *Methods Ecol. Evol.* **4**, 133-142 (2013).
- 374 26. Yu, D. W. *et al.* Biodiversity soup: Metabarcoding of arthropods for rapid  
375 biodiversity assessment and biomonitoring. *Methods Ecol. Evol.* **3**, 613-623,  
376 doi:10.1111/j.2041-210X.2012.00198.x (2012).
- 377 27. NBN Gateway. National Biodiversity Networks Gateway <https://data.nbn.org.uk/>  
378 (2015).
- 379 28. de Jong, Y. *et al.* Fauna Europaea – all European animal species on the web.  
380 Biodiversity Data Journal. **2**, e4034, doi:10.3897/BDJ.2.e4034 (2014).
- 381 29. AntWeb. AntWeb <https://www.antweb.org> (2015)
- 382 30. British Arachnological Society. Spider and harvestman recording scheme  
383 <http://srs.britishspiders.org.uk> (2015).
- 384 31. Nentwig W, Blick T, Gloor D, Hänggi A, Kropf C. Spiders of Europe  
385 [www.araneae.unibe.ch](http://www.araneae.unibe.ch) (2015).
- 386
